# Supplementary material for: Genetic Variation and Recurrent Haplotypes on Chromosome 6q23-25 Risk Locus in Familial Lung Cancer
Source: Oxford University Press journal article supplement (doi:10.1158/0008-5472.can-20-3196), 2021-04-14
Supplement: 00085472can203196-sup-252108_3_supp_7039353_qr7r1w.docx [file 00085472can203196-sup-252108_3_supp_7039353_qr7r1w.docx]

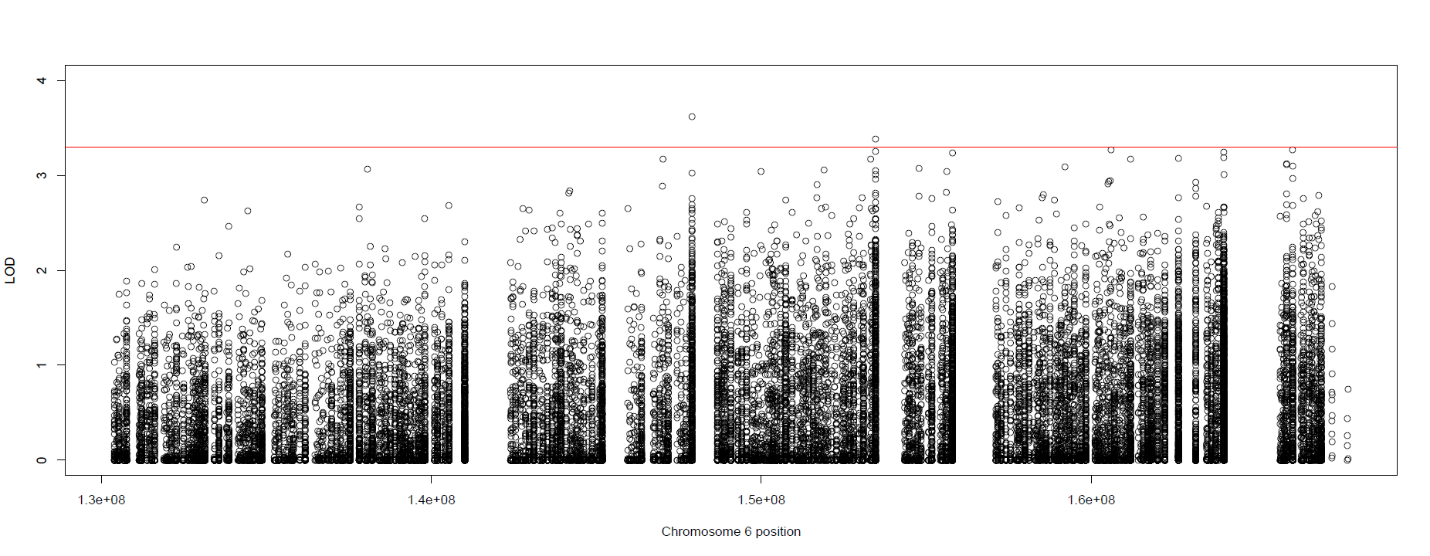


**Supplementary Figure S1:** Collapsed haplotype pattern (CHP) analysis across all 9 families. The heterogeneity LOD (HLOD) scores of the regional CHP analysis. The line at 3.3 represents the line for genome-wide significance based on Lander and Kruglyak.
