# Supplementary material for: Genetic Variation and Recurrent Haplotypes on Chromosome 6q23-25 Risk Locus in Familial Lung Cancer
Source: Oxford University Press journal article supplement (doi:10.1158/0008-5472.can-20-3196), 2021-04-14
Supplement: 00085472can203196-sup-252108_3_supp_7039355_qr7r1w.docx [file 00085472can203196-sup-252108_3_supp_7039355_qr7r1w.docx]

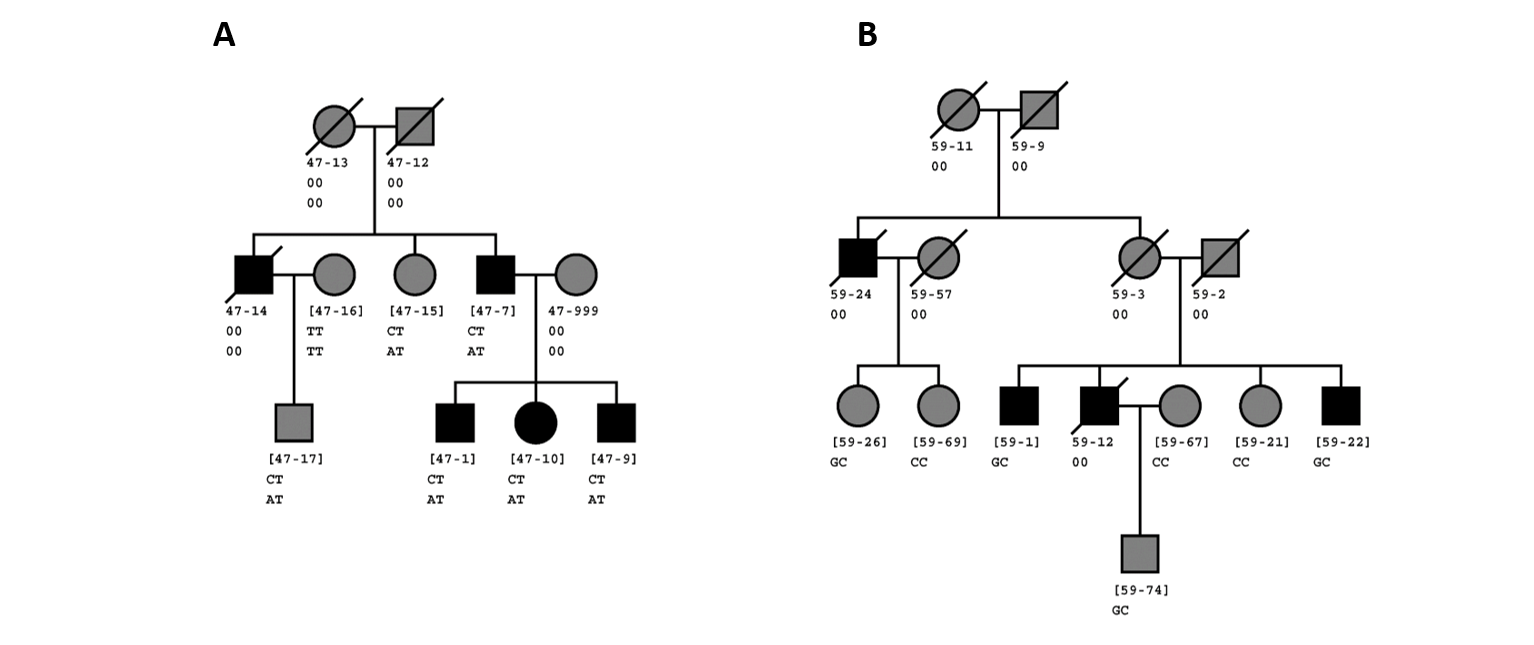


**Supplementary Figure S3:** Segregation of potential causal variants in *ARID1B* in families 47 and 59. In both pedigrees, gray symbols represent non-affected individuals (coded as missing in the analysis) and black symbol represent affected individuals. The diagonal slash through the symbol represents a deceased individual and brackets around an individual’s ID represents individuals who were sequenced. A) Family 47 pedigree with the first two letters underneath the individual ID represents the individual’s genotype at rs564982701 (major allele = T, minor allele = C) and the second two letters underneath the individual ID represents the individual’s genotype at rs150018283 (major allele = T, minor allele = A). B) Family 59 pedigree with the two letters underneath the individual ID represents the individual’s genotype at rs187390535 (major allele = C, minor allele = G)
