# Supplementary material for: Genetic Variation and Recurrent Haplotypes on Chromosome 6q23-25 Risk Locus in Familial Lung Cancer
Source: Oxford University Press journal article supplement (doi:10.1158/0008-5472.can-20-3196), 2021-04-14
Supplement: 00085472can203196-sup-252108_3_supp_7039360_qr7r1x.xlsx [file 00085472can203196-sup-252108_3_supp_7039360_qr7r1x.xlsx]

## Sheet: Supplementary Table S3A
Supplementary Table 3A: Highest Region-based LOD Scores for each Linked Haplotype
											Legend
Region	Haplotype	CLOD	Fam 30 LOD	Fam 33 LOD	Fam 35 LOD	Fam 42 LOD	Fam 44 LOD	Fam 47 LOD	Fam 59 LOD			Region = Region that LOD scores are calculated on (either gene or intergenic region
PHACTR2	30-33-35	1.671	0.7693	0.5629	0.3388	.	.	.	.			Haplotype = the families along the linked haplotype for this region
UTRN	30-33-35	1.6594	0.7701	0.5499	0.3394	.	.	.	.			CLOD = cumulative LOD score on the region
GRM1	30-33-35	1.6567	0.7682	0.5496	0.3389	.	.	.	.			Fam 30 LOD = LOD score on the region for family 30
SAMD5,SASH1	30-33-35	1.6553	0.7679	0.5499	0.3375	.	.	.	.			Fam 33 LOD = LOD score on the region for family 33
UTRN,EPM2A	30-33-35	1.6551	0.7682	0.5484	0.3385	.	.	.	.			Fam 35 LOD = LOD score on the region for family 35
PLG,MAP3K4	42-44	1.8217	.	.	.	0.5297	1.292	.	.			Fam 42 LOD = LOD score on the region for family 33
MAP3K4	42-44	1.8216	.	.	.	0.5351	1.2865	.	.			Fam 44 LOD = LOD score on the region for family 33
LPA,PLG	42-44	1.7636	.	.	.	0.4711	1.2925	.	.			Fam 47 LOD = LOD score on the region for family 33
ARID1B	47-59	1.5791	.	.	.	.	.	0.8132	0.7659			Fam 59 LOD = LOD score on the region for family 33
ZDHHC14	47-59	1.5774	.	.	.	.	.	0.8126	0.7648
NOX3,ARID1B	47-59	1.5758	.	.	.	.	.	0.8139	0.7619
NOX3	47-59	1.5735	.	.	.	.	.	0.8127	0.7608

## Sheet: Supplementary Table S3B
Supplementary Table S3B: Region-based LOD Scores of 30-33-35 Linked Haplotype
								Legend
Region	Start	Stop	CLOD	Fam 30 LOD	Fam 33 LOD	Fam 35 LOD			Region = Region that LOD scores are calculated on (either gene or intergenic region)
PHACTR2	143928437	144153292	1.671	0.7693	0.5629	0.3388			Start = Start position of the region in bp
UTRN	144611924	145175023	1.6594	0.7701	0.5499	0.3394			Stop = Stop position of the region in bp
GRM1	146348747	146759661	1.6567	0.7682	0.5496	0.3389			CLOD = Cumulative LOD score across families 30, 33, and 35
SAMD5,SASH1	147892247	148661889	1.6553	0.7679	0.5499	0.3375			Fam 30 LOD = LOD score of the region for family 30
UTRN,EPM2A	145175208	145945278	1.6551	0.7682	0.5484	0.3385			Fam 33 LOD = LOD score of the region for family 33
ADGB	146920271	147136528	1.5899	0.7034	0.5484	0.3381			Fam 35 LOD = LOD score of the region for family 35
STXBP5-AS1	147161829	147524615	1.5715	0.7049	0.5499	0.3167
UST	149067372	149399100	1.4993	0.7657	0.3948	0.3388
SHPRH	146208120	146286037	1.4124	0.5256	0.5479	0.3389
STXBP5,SAMD5	147713151	147828738	1.3956	0.6663	0.391	0.3383
LINC00602,T	166404335	166570112	1.3873	0.7167	0.3908	0.2798
PDE10A	165740447	166073277	1.3447	0.6356	0.3908	0.3183
SASH1	148663071	148874177	1.3224	0.7671	0.3928	0.1625
GRM1,RAB32	146759992	146863522	1.3124	0.7455	0.3907	0.1762
GPR126	142623952	142767890	1.217	0.7716	0.5484	-0.103
LRP11	150139112	150184208	1.2145	0.7697	0.5479	-0.1031
QKI,C6orf118	164000948	165691761	1.1964	0.8054	0.5591	-0.1681
KATNA1	149916013	149969663	1.1928	0.7679	0.3926	0.0323
MIR4465,NMBR	141006355	142395720	1.1638	0.7701	0.5486	-0.1549
LOC645434,LOC100132735	139797319	140090782	1.161	0.7147	0.5494	-0.1031
GPR126,LOC153910	142768536	142846565	1.1602	0.7668	0.3908	0.0026
LOC153910	142846707	142960001	1.0908	0.715	0.4789	-0.1031
MIR3668,MIR4465	140527653	141001882	1.0774	0.7739	0.5496	-0.2461
VTA1	142467387	142542136	1.068	0.7657	0.3907	-0.0884
HIVEP2	143072350	143265487	1.0614	0.7735	0.391	-0.1031
PPP1R14C	150463376	150572489	1.0578	0.7679	0.1067	0.1832
FUCA2,LOC285740	143834441	143873045	1.0564	0.7686	0.3908	-0.103
TNFAIP3,PERP	138209785	138408573	1.0178	0.6711	0.5092	-0.1625
IFNGR1,OLIG3	137542091	137812323	1.004	0.5909	0.5491	-0.136
LOC153910,HIVEP2	142960190	143071171	0.9964	0.7196	0.391	-0.1142
ABRACL,HECA	139366340	139455233	0.9874	0.6635	0.391	-0.0671
OLIG3,LOC102723649	137816766	137985652	0.9818	0.7352	0.3907	-0.1441
ENPP1,CTGF	132217556	132267818	0.9669	0.6635	0.4065	-0.1031
RPS6KA2	166822018	167276041	0.9628	0.3784	0.3908	0.1936
TARID	133824071	134210037	0.9393	0.6757	0.4072	-0.1436
LOC100132735	140092048	140182546	0.9325	0.4877	0.5479	-0.1031
SGK1,LOC101928231	134640332	134749096	0.9298	0.6675	0.3995	-0.1372
LINC00271,PDE7B	136013534	136171566	0.9223	0.6751	0.3908	-0.1436
PLAGL1	144260703	144384404	0.9107	0.7675	0.2824	-0.1392
SASH1,UST	148874209	149066706	0.8897	0.1596	0.3907	0.3394
EPM2A	145945442	146055568	0.8896	0.1626	0.3908	0.3362
LINC01013,MOXD1	132491930	132615068	0.8871	0.5908	0.4131	-0.1168
VTA1,GPR126	142543600	142621947	0.8806	0.2536	0.5476	0.0794
TMEM200A,SMLR1	130765415	131147496	0.8799	0.7334	0.4079	-0.2614
DKFZp451B082,CAHM	163769090	163832755	0.8555	0.3784	0.3907	0.0864
PACRG	163148166	163735945	0.8437	0.5642	0.3908	-0.1113
LOC101928304,ALDH8A1	134862537	135237359	0.8236	0.5863	0.4771	-0.2398
LINC01312,TARID	134143009	134172296	0.8091	0.5852	0.3226	-0.0987
ZC2HC1B	144186862	144259991	0.8009	0.1613	0.3908	0.2488
LINC00326,EYA4	133428933	133561012	0.7951	0.6066	0.3184	-0.1299
HECA,TXLNB	139503128	139559885	0.7742	0.6658	0.064	0.0444
LOC100132735,LOC100507477	140182769	140296384	0.7712	0.1806	0.5469	0.0437
STX11,UTRN	144514425	144611581	0.7561	0.7657	0.0935	-0.1031
KIAA1244	138483517	138665889	0.7461	-0.0115	0.5489	0.2087
FNDC1,LOC102724053	159694344	159803460	0.7397	0.2387	0.3907	0.1103
ULBP1,RAET1K	150296333	150318085	0.7392	0.2514	0.3907	0.0971
PDE10A,LINC00473	166077817	166335959	0.7329	0.4823	0.391	-0.1404
UST,TAB2	149399194	149537327	0.7297	0.7682	0.0629	-0.1014
MTFR2	136551487	136572311	0.7135	0.1615	0.5481	0.0039
RMND1	151725206	151773206	0.7094	-0.0474	0.5476	0.2092
FNDC1	159591403	159693967	0.7004	0.1821	0.31	0.2083
ALDH8A1	135237686	135272087	0.6666	0.1541	0.4802	0.0323
LINC00473	166336597	166400854	0.6576	0.3781	0.3908	-0.1113
HECA	139457971	139502639	0.6552	0.3634	0.3907	-0.0989
QKI	163837341	164000396	0.6336	0.3784	0.3566	-0.1014
ULBP1	150284216	150295428	0.6302	0.5947	0.0031	0.0324
RAB32	146863903	146876819	0.6266	0.1115	0.5457	-0.0306
NHSL1,FLJ46906	138894852	139011415	0.625	0.6777	-0.2367	0.184
LOC100507477,MIR3668	140415973	140524081	0.6168	0.1683	0.5499	-0.1014
SF3B5,STX11	144417941	144469837	0.6093	0.1647	0.5476	-0.103
MYCT1	153018034	153046455	0.6033	0.1068	0.1554	0.3411
BCLAF1,MAP7	136612727	136660065	0.5936	0.0104	0.5491	0.0341
STX7,TAAR9	132835568	132858174	0.5921	0.1617	0.4098	0.0206
LOC285740,PHACTR2	143891950	143928313	0.5888	0.1596	0.5605	-0.1313
FLJ46906,LOC100507462	139019628	139044135	0.5854	0.1536	0.403	0.0288
TAGAP,LOC101929122	159467351	159585252	0.581	0.0622	0.3908	0.128
ULBP3	150384827	150390213	0.5797	0.0016	0.5459	0.0322
PEX3	143772311	143812033	0.5719	0.0054	0.5585	0.008
ZC3H12D	149767921	149806924	0.5675	0.7664	-0.0959	-0.103
MAP3K5	136878046	137112633	0.5669	0.1619	0.5486	-0.1436
MAP7	136662686	136872558	0.5661	0.1618	0.5479	-0.1436
SOD2,WTAP	160115421	160146670	0.5649	0.0492	0.3908	0.1249
PDE7B,MTFR2	136520019	136551127	0.5571	0.0031	0.5501	0.0039
LOC100507557	146057217	146207657	0.5545	0.7565	-0.2391	0.0371
MYB	135502040	135541194	0.5531	0.0016	0.5491	0.0024
PERP	138408768	138429651	0.5525	0.0014	0.5489	0.0022
MTRF1L	153307949	153324546	0.5503	0.0017	0.5466	0.002
AKAP7,ARG1	131609065	131893281	0.5498	0.2274	0.4659	-0.1435
FUCA2	143815127	143833897	0.5464	0.1515	0.3908	0.0041
LINC01010,LOC101928231	134759242	134798147	0.5448	0.671	-0.2415	0.1153
TAB2	149538248	149733664	0.5295	0.2383	0.3943	-0.1031
SLC35D3,NHEG1	137248032	137302244	0.5243	0.1618	0.391	-0.0285
LOC101928304	134846112	134862110	0.5224	0.6646	0.0014	-0.1436
TNFAIP3	138189515	138203742	0.5199	0.003	0.5124	0.0045
ENPP3,ENPP1	132069917	132127669	0.5058	0.597	0.0341	-0.1253
SAMD5	147830073	147892127	0.4792	0.1596	0.0029	0.3167
TXLNB	139560803	139614025	0.4772	0.5924	-0.0139	-0.1013
SGK1	134490957	134639713	0.4548	0.1919	0.4065	-0.1436
PHACTR2,LTV1	144153461	144162284	0.4535	-0.0682	0.5576	-0.0359
GINM1	149886781	149911554	0.4519	0.0289	0.3908	0.0322
TBPL1	134272398	134308187	0.4505	0.2222	0.3292	-0.1009
IFNGR1	137517772	137541521	0.4495	0.0029	0.5479	-0.1013
MAP3K4	161411973	161539375	0.4494	0.1617	0.3908	-0.1031
LINC01010	134758900	134825313	0.4488	0.6536	-0.1712	-0.0336
RAET1E-AS1	150186524	150240083	0.4478	0.0028	0.5481	-0.1031
STXBP5	147525846	147712079	0.4476	0.1596	0.391	-0.103
ADAT2	143743617	143771144	0.4474	-0.0327	0.5533	-0.0732
AIG1	143380517	143662386	0.4448	0.1596	0.391	-0.1058
ECT2L	139116706	139224903	0.4446	0.2571	0.2906	-0.1031
C6orf99	159308709	159332286	0.4424	0.0688	0.3907	-0.0171
LATS1	149978321	150039720	0.4358	-0.0102	0.5491	-0.1031
EYA4	133561646	133849868	0.4288	0.1619	0.4105	-0.1436
CTGF,LINC01013	132273991	132453620	0.425	0.1652	0.4039	-0.1441
T,LOC101929297	166583207	166649210	0.4248	-0.157	0.3324	0.2494
SHPRH,GRM1	146286620	146347836	0.4247	0.7668	-0.239	-0.1031
PCMT1	150070095	150133188	0.4245	0.0015	0.3908	0.0322
NHSL1	138742249	138894561	0.4199	0.7422	-0.211	-0.1113
SLC2A12,HMGA1P7	134375588	134434008	0.4178	0.1618	0.4001	-0.1441
LOC102723649,LOC100507406	137996779	138049711	0.4143	0.1249	0.3907	-0.1013
AHI1	135604158	135818135	0.414	0.1765	0.3908	-0.1533
LOC101928661	146914674	146919485	0.4132	0.0031	0.5115	-0.1014
L3MBTL3	130400092	130463194	0.4126	0.2305	0.3257	-0.1436
LOC100507406,LOC100130476	138063120	138143632	0.4073	0.1596	0.3929	-0.1452
MAP3K5,PEX7	137114758	137141890	0.394	0.0013	0.3907	0.002
RUNX2	45459922	45459922	0.3939	0.0013	0.3907	0.0019
ULBP3,PPP1R14C	150391236	150462959	0.3908	-0.0324	0.3908	0.0324
RPS6KA2-IT1	166874223	166878799	0.3861	0.2694	0.0678	0.0489
IPCEF1,OPRM1	154481394	154567863	0.3844	-0.0602	0.5476	-0.103
TCF21,TBPL1	134217699	134272072	0.3813	0.2896	0.1924	-0.1007
LOC100507462	139045368	139094638	0.375	0.3685	-0.1004	0.1069
ENPP3	131957905	132069529	0.3736	0.6398	-0.2134	-0.0528
TXLNB,CITED2	139614425	139692331	0.3693	0.2525	0.2196	-0.1028
HMGA1P7,SGK1	134440071	134489307	0.3672	0.7554	-0.2414	-0.1468
SCAF8	155053583	155156221	0.3655	-0.057	0.0811	0.3414
IL22RA2	137464218	137495707	0.3598	-0.0114	0.3908	-0.0196
VNN2	133064474	133085461	0.3545	0.0014	0.3209	0.0322
EPB41L2	131159590	131385227	0.3449	0.6613	-0.2134	-0.103
PLAGL1,SF3B5	144387094	144414868	0.3427	0.0019	0.0023	0.3385
FBXO5	153290809	153305563	0.3254	0.0028	0.0019	0.3207
SLC22A2,SLC22A3	160681063	160768212	0.3206	0.0754	0.3483	-0.1031
LINC01013	132454127	132491083	0.3195	0.0388	0.4111	-0.1304
PNLDC1,MAS1	160242841	160326840	0.3169	0.029	0.391	-0.1031
RAET1K,RAET1L	150327994	150340075	0.3069	0.0014	0.3907	-0.0852
MOXD1	132616654	132722837	0.3061	0.014	0.3951	-0.103
AKAP7	131456023	131605434	0.2983	0.6601	-0.2134	-0.1484
PNLDC1	160220575	160242684	0.2938	0.0059	0.391	-0.1031
RAET1G	150238160	150245203	0.2896	0.0018	0.3908	-0.103
AGPAT4,PARK2	161696163	161767537	0.2859	0.0375	0.3679	-0.1195
LINC00271	135819737	136012781	0.2841	0.6692	-0.2416	-0.1435
ABRACL	139349151	139365330	0.2816	0.0032	0.3911	-0.1127
IPCEF1,CNKSR3	154679267	154725382	0.2742	-0.283	0.3907	0.1665
TMEM200A	130687773	130765164	0.2686	0.0107	0.4014	-0.1435
STX11	144473172	144513733	0.2634	0.0231	0.2205	0.0198
C6orf118,PDE10A	165724152	165739330	0.2548	0.1115	0.2234	-0.0801
PKIB	122842333	122842439	0.2516	0	0.2462	0.0054
LOC729603	160514246	160517094	0.2485	0.0004	0.2462	0.0019
LOC100130476	138144078	138188713	0.2422	0.0886	0.186	-0.0324
CNKSR3	154725814	154832680	0.2421	-0.1662	0.5469	-0.1386
TAB2,ZC3H12D	149733871	149767105	0.2328	-0.0551	0.391	-0.1031
CCDC28A	139094937	139115303	0.2266	0.0113	0.2113	0.004
RAET1L	150340526	150347617	0.2209	0.0025	0.186	0.0324
PPIL4	149825264	149866780	0.2168	0.1595	0.1604	-0.1031
CCDC170,ESR1	151943434	152010561	0.2082	-0.2393	0.5506	-0.1031
TTLL2	167738595	167744473	0.1985	0.1317	0.0605	0.0063
ADGB,STXBP5-AS1	147137739	147161306	0.1756	0.1596	0.0122	0.0038
SYNE1,MYCT1	152959648	153017986	0.1718	-0.2312	0.5489	-0.1459
TAAR9,TAAR8	132861957	132872759	0.1677	0.1617	0.0019	0.0041
STX7	132778215	132835314	0.166	0.0783	0.1907	-0.103
TCF21	134210598	134217540	0.165	0.1619	0.001	0.0021
LINC01010,LOC101928304	134826329	134845441	0.1594	0.1619	-0.0065	0.004
GTF2H5	158589608	158620608	0.1589	-0.0114	-0.0386	0.2089
MOXD1,STX7	132724116	132777463	0.1567	0.4293	-0.2134	-0.0592
VIP,FBXO5	153082355	153287231	0.1535	-0.6229	0.445	0.3314
C6orf118	165692224	165724052	0.148	0.2036	0.0171	-0.0727
CLDN20,TFB1M	155585868	155596700	0.1464	0.0013	0.2173	-0.0722
NMBR,VTA1	142411084	142466756	0.128	0.5195	-0.2234	-0.1681
PERP,KIAA1244	138430056	138482043	0.1186	0.1207	-0.2113	0.2092
TMEM181	158956658	159056490	0.1182	0.1953	0.0609	-0.138
SAMD3	130464449	130686525	0.1145	0.1619	0.0962	-0.1436
AKAP12	151560193	151680678	0.1135	-0.7797	0.5504	0.3428
PACRG-AS1,DKFZp451B082	163746575	163758350	0.0924	0.089	0.0014	0.002
IYD	150689705	150726746	0.0812	-0.8068	0.5489	0.3391
T	166570156	166582979	0.0791	0.0066	0.0238	0.0487
RGS17,OPRM1	153453501	154330629	0.0773	-0.8109	0.5476	0.3406
LOC101929297	166649499	166671337	0.0765	-0.0601	0.1023	0.0343
PLEKHG1	150920008	151165708	0.0751	-0.8124	0.5494	0.3381
RAB32,LOC101928661	146879427	146914246	0.0679	0.0973	-0.0995	0.0701
C6orf211,CCDC170	151793095	151813483	0.0669	-0.0196	0.1896	-0.1031
RAET1G,ULBP2	150245907	150262097	0.0651	0.0289	0.0019	0.0343
SYNE1	152441843	152959404	0.0618	-0.8067	0.5481	0.3204
C6orf211	151774339	151792026	0.0605	0.1607	0.0029	-0.1031
MIR548A1,LOC101928519	18726551	18771945	0.0508	0	0.0498	0.001
RPS6KA2,RPS6KA2-AS1	167276822	167308627	0.0473	0.0433	0.002	0.002
NMBR	142395799	142410797	0.0419	0.0948	-0.2113	0.1584
RAET1L,ULBP3	150347787	150384648	0.0404	-0.019	-0.0063	0.0657
IPCEF1	154476318	154678347	0.038	-0.2807	0.3912	-0.0725
MPC1	166777599	166795768	0.0377	0.0013	0.0344	0.002
LOC100128176	149275403	149285768	0.0354	0.0019	0.0013	0.0322
LATS1,NUP43	150041404	150043021	0.0354	0.0015	0.0016	0.0323
RAET1K	150318281	150327202	0.0351	0.0014	0.0014	0.0323
RPS18P9	149914345	149915398	0.0345	0.0014	0.0009	0.0322
ARG1	131893463	131900390	0.0344	0.0013	0.0009	0.0322
AGPAT4-IT1	161582291	161582693	0.0344	0.0013	0.0009	0.0322
PCMT1,LRP11	150133601	150138734	0.0343	0.0013	0.0009	0.0321
HLA-A,HCG9	29936065	29936408	0.0338	0.0004	0.001	0.0324
ULBP2	150262994	150271331	0.0322	0.0027	-0.0028	0.0323
PEX7,SLC35D3	137236179	137242096	0.0255	0.0031	0.0019	0.0205
ULBP2,ULBP1	150271944	150283907	0.0254	-0.0103	0.0034	0.0323
LOC101928231	134749220	134799829	0.0248	0.0368	-0.1331	0.1211
HBS1L	135280519	135376861	0.0243	0.0556	0.0718	-0.1031
PPIL4,GINM1	149868764	149886258	0.022	0.0015	-0.0118	0.0323
PLEKHG1,MTHFD1L	151165830	151185555	0.0217	-0.0115	0.0009	0.0323
SLC35D3	137242532	137247466	0.0194	0.004	-0.0053	0.0207
SFT2D1	166732587	166755480	0.0192	0.0564	0.0202	-0.0574
BEND6	56840346	56840553	0.0191	0.0155	0.0022	0.0014
LINC01277,AIG1	143359846	143379481	0.0155	0.0043	0.003	0.0082
LOC102723649	137985859	137996660	0.0152	0.0016	0.0011	0.0125
BCLAF1	136577200	136609564	0.0127	0.0041	0.0025	0.0061
OSTCP1,C6orf99	159279904	159308521	0.0119	-0.071	0.0807	0.0022
LINC01277	143286922	143359128	0.0102	0.1596	0.0709	-0.2203
PACRG-AS1	163731037	163746335	0.0088	0.3526	-0.2426	-0.1012
MIR3668	140525948	140527294	0.0088	0.0028	0.0019	0.0041
SLC18B1,RPS12	133120782	133134472	0.0084	0.0029	0.002	0.0035
KATNBL1P6	147122877	147124497	0.0083	0.0026	0.0018	0.0039
CLDN20	155585154	155597644	0.0083	0.0026	0.0018	0.0039
GUSBP4,NONE	58294828	58779473	0.0065	0.0027	0.0024	0.0014
IGF2R,SLC22A1	160528634	160541348	0.0065	0.0022	0.0021	0.0022
RAET1E	150209717	150212003	0.0064	0.002	0.0014	0.003
OR12D2,OR11A1	29378439	29378620	0.0052	0.002	0.0009	0.0023
NONE,HACE1	104794722	105107744	0.0051	0.0016	0.0011	0.0024
VNN3	133043016	133056638	0.0051	0.0016	0.0011	0.0024
GMDS-AS1	2376528	2376667	0.0049	0.0009	0.001	0.003
MTCH1	36936483	36946458	0.0048	0.0013	0.0015	0.002
GOPC,LOC101927919	117940061	117941035	0.0048	0.0015	0.001	0.0023
NHEG1	137302669	137313467	0.0048	0.0013	0.0015	0.002
OLIG3	137812582	137816345	0.0048	0.0015	0.001	0.0023
FBXO30	146125535	146126580	0.0048	0.0015	0.001	0.0023
WTAP,LOC100129518	160178665	160180003	0.0048	0.0015	0.001	0.0023
AIRN	160424760	160428561	0.0048	0.0016	0.0011	0.0021
LINC00473,LINC00602	166401103	166401512	0.0048	0.0015	0.001	0.0023
TAAR9	132859437	132860742	0.0047	0.0015	0.001	0.0022
MRPL18	160211554	160219973	0.0046	0.0014	0.0013	0.0019
TPBG,UBE3D	83195087	83195206	0.0045	0.0014	0.001	0.0021
TAAR3	132928683	132931433	0.0045	0.0014	0.001	0.0021
HEBP2,NHSL1	138737676	138742172	0.0045	0.0015	0.0009	0.0021
SF3B5	144415154	144417730	0.0045	0.0014	0.001	0.0021
ESR1,SYNE1	152425582	152441587	0.0045	0.0014	0.001	0.0021
HDGFL1,NRSN1	23867227	24042393	0.0045	0.0017	0.0015	0.0013
TAGAP	159454897	159466214	0.0044	0.0014	0.001	0.002
LOC101929122	159585941	159590086	0.0044	0.0015	0.001	0.0019
SLC35A1	88193552	88193852	0.0044	0.0016	0.0007	0.0021
SNHG5,HTR1E	86685341	87236398	0.0043	0.0027	0.0002	0.0014
HEBP2	138724658	138735517	0.0043	0.0014	0.0009	0.002
MEI4,IRAK1BP1	78898738	79567719	0.0042	0.0013	0.0009	0.002
TAAR5	132908879	132911719	0.0042	0.0013	0.0009	0.002
IL22RA2,IFNGR1	137496672	137517491	0.0042	0.0013	0.0009	0.002
PBOV1	138537432	138539556	0.0042	0.0013	0.0009	0.002
CITED2	139692511	139696429	0.0042	0.0013	0.0009	0.002
OR2B6,ZNF165	27969004	27970391	0.0041	0.0013	0.0009	0.0019
RIMS1	72854149	72854283	0.0041	0.0013	0.0009	0.0019
MIR2113,POU3F2	98980113	99064295	0.0041	0.0013	0.0009	0.0019
RPS12,SNORA33	133139026	133139334	0.0041	0.0013	0.0009	0.0019
ALDH8A1,HBS1L	135272356	135280438	0.0041	0.0013	0.0009	0.0019
SYNE1-AS1	152701996	152702821	0.0041	0.0013	0.0009	0.0019
MIR3918;EZR,SYTL3	159185959	159186692	0.0041	0.0013	0.0009	0.0019
MRAP2,CEP162	84816620	84816630	0.004	0.0014	0.0009	0.0017
TREM1,NCR2	41276004	41276004	0.0038	0.0012	0.0008	0.0018
RNGTT,PNRC1	89679114	89705618	0.0038	0.0012	0.0008	0.0018
FLJ46906	139011836	139019029	0.0037	0.0008	0.0013	0.0016
ZBED9,LOC401242	28557129	28744045	0.0033	0.0013	0.0009	0.0011
HYMAI	144324316	144329814	0.0032	0.0013	0.0009	0.001
MTRF1L,RGS17	153324991	153330468	0.0032	0.0013	0.0009	0.001
LACE1	108699897	108699897	0.0026	0.0014	0.0012	0
LINC01312	134142442	134174768	0.0026	0	0.001	0.0016
LPAL2,LPA	160934608	160949428	0.0025	0.0006	0.0009	0.001
GRIK2	101961643	101961806	0.0024	0.0015	0.0009	0
BCKDHB	80895635	81006968	0.0021	0	0.0007	0.0014
NT5DC1	116565504	116566438	0.002	0.0004	0.0009	0.0007
EZR-AS1,OSTCP1	159244973	159261067	0.002	0.0044	-0.0063	0.0039
ACOT13	24677968	24679178	0.0019	0.0005	0.0014	0
NOTCH4,C6orf10	32223632	32223785	0.0012	0	0.0012	0
LOC100289495,MPC1	166766142	166777115	0.0012	0.0016	-0.0028	0.0024
OSTCP1	159261360	159279553	0.001	0.0015	-0.0028	0.0023
PRR18	166718235	166722714	0.001	0.0004	0.0006	0
ME1,PRSS35	84156904	84158736	0.0008	0	0.0008	0
MIR4465	141004533	141005338	0.0006	0.0013	-0.0027	0.002
MTFR2,BCLAF1	136572881	136576589	0.0004	0.0013	-0.0028	0.0019
LTV1	144165285	144184227	0.0001	0.0026	-0.0064	0.0039
LOC100507406	138050926	138061071	-0.0022	0.0017	-0.0065	0.0026
GMDS	1737852	1738222	-0.0022	-0.0268	0.0146	0.01
CTGF	132268964	132273264	-0.003	0.0014	-0.0064	0.002
TAAR3,TAAR2	132931457	132937091	-0.003	0.0014	-0.0064	0.002
ARG1,MED23	131895920	131904719	-0.0031	0.0013	-0.0064	0.002
DYNLT1,SYTL3	159067429	159069940	-0.0039	0.0013	-0.0072	0.002
WTAP	160147058	160178323	-0.0049	0.0018	-0.2156	0.2089
TFAP2B,PKHD1	51272494	51275121	-0.0053	0.0005	-0.0071	0.0013
EYS	65036207	66043219	-0.0078	0.002	-0.0127	0.0029
ME1	84102004	84102550	-0.0085	-0.0114	0.0009	0.002
VNN1,VNN3	133036214	133042840	-0.0106	0.0013	0.0363	-0.0482
TAAR1	132965208	132968095	-0.0149	0.0027	0.0019	-0.0195
CEP85L	118817068	118907285	-0.0154	0.0017	0.0019	-0.019
TAAR6	132890748	132893004	-0.0174	0.0013	0.0009	-0.0196
SYTL3	159070442	159185563	-0.0209	0.187	-0.1048	-0.1031
GFOD1,SIRT5	13521802	13560418	-0.022	0.0007	-0.0239	0.0012
ZBTB2,RMND1	151713902	151724756	-0.0283	0.029	0.0019	-0.0592
AIG1,ADAT2	143662850	143742264	-0.0299	0.0612	0.012	-0.1031
RSPH3,TAGAP	159422463	159454387	-0.0333	0.0519	0.0178	-0.103
TAAR8,TAAR6	132876414	132890341	-0.0363	0.004	-0.0213	-0.019
LOC101929239	163464719	163474312	-0.0366	0.0016	0.001	-0.0392
MAP3K4,AGPAT4	161539520	161550032	-0.0368	0.0117	0.0147	-0.0632
MRPL18,TCP1	160210871	160211485	-0.0489	-0.0168	-0.0507	0.0186
SYNJ2,SERAC1	158521300	158529418	-0.0506	-0.0277	-0.0251	0.0022
MYB,AHI1	135541395	135604070	-0.054	0.3311	-0.2415	-0.1436
TFB1M	155577374	155636071	-0.0544	-0.6365	0.5461	0.036
LOC102724053	159803605	159817950	-0.0568	0.0128	0.0193	-0.0889
PDSS2	107620876	107620876	-0.0569	0.0013	0.0009	-0.0591
MPC1,RPS6KA2	166798478	166821813	-0.0614	0.048	-0.0064	-0.103
AKAP12,ZBTB2	151681431	151683721	-0.0732	0.0289	0.0009	-0.103
KIAA1244,HEBP2	138666838	138724013	-0.0744	0.1596	-0.2393	0.0053
PPP1R14C,IYD	150572568	150688732	-0.0784	-0.8067	0.3908	0.3375
TCP1	160199687	160210599	-0.0799	-0.0294	0.0073	-0.0578
LOC102724201,TBX18	85422442	85430017	-0.0815	0.0289	0.0009	-0.1113
VNN2,SLC18B1	133085941	133088814	-0.0867	0.0013	0.001	-0.089
LOC100289495	166756130	166765805	-0.0872	0.0147	-0.0035	-0.0984
LINC00326	133409004	133428350	-0.0965	0.1115	-0.2133	0.0053
LOC100507477,LOC103352541	140299690	140311604	-0.0981	0.0029	0.002	-0.103
ZC3H12D,PPIL4	149807523	149823899	-0.0996	0.0023	0.0011	-0.103
NUP43	150045436	150067989	-0.0999	0.0013	0.002	-0.1032
VIP	153071646	153080640	-0.1006	0.0014	0.0009	-0.1029
HMGA1P7	134434329	134439764	-0.1008	0.0013	0.0009	-0.103
KATNA1,LATS1	149972087	149977802	-0.1008	0.0013	0.001	-0.1031
HBS1L,MYB	135377091	135500773	-0.1009	0.2335	-0.2313	-0.1031
TAAR6,TAAR5	132893712	132908654	-0.1009	0.0013	0.0009	-0.1031
MED23,ENPP3	131950401	131956670	-0.1043	0.0014	-0.0027	-0.103
PLG,MAP3K4	161176256	161411449	-0.1055	-0.8263	0.3907	0.3301
LOC102723831	151517104	151549416	-0.1079	-0.0115	0.0066	-0.103
LOC102723883,LOC101928280	68848649	68848649	-0.1347	0	0.0022	-0.1369
SOD2	160099260	160115127	-0.1378	0.0033	-0.1437	0.0026
TAAR1,VNN1	132968257	133000800	-0.1387	0.015	-0.0179	-0.1358
MYCT1,VIP	153046842	153070786	-0.1421	-0.1317	0.0614	-0.0718
LOC100507477	140296625	140415139	-0.1446	0.0647	-0.2415	0.0322
VNN1	133001279	133036058	-0.1463	0.0027	-0.0055	-0.1435
PEX7	137142886	137235988	-0.1463	0.0038	-0.0065	-0.1436
CAHM	163833269	163834157	-0.1511	-0.1532	0.001	0.0011
SLC22A1	160543080	160580496	-0.155	-0.1625	0.1188	-0.1113
PRR18,SFT2D1	166722871	166732338	-0.1611	-0.1751	0.0117	0.0023
LOC285740	143874639	143891420	-0.1693	0.0141	-0.0803	-0.1031
LOC101929297,PRR18	166671718	166718042	-0.1696	0.1595	-0.2426	-0.0865
TTLL2,TCP10	167761543	167763664	-0.1718	0	-0.175	0.0032
TAAR2	132937346	132946302	-0.1726	0.057	-0.1265	-0.1031
EPB41L2,AKAP7	131385986	131455518	-0.1753	0.0668	-0.209	-0.0331
GSTA3,GSTA4	52782096	52783041	-0.1756	0.0028	-0.1825	0.0041
IYD,PLEKHG1	150726899	150918964	-0.1796	-0.8067	0.3908	0.2363
IL20RA,IL22RA2	137367368	137463567	-0.1828	0.1617	-0.2415	-0.103
CITED2,LOC645434	139697704	139789100	-0.1845	0.1601	-0.2415	-0.1031
SLC2A12	134308725	134374673	-0.186	0.0027	-0.1198	-0.0689
REPS1,ABRACL	139311050	139348484	-0.1941	0.0061	-0.2054	0.0052
MTHFD1L	151186517	151423606	-0.2009	-0.6233	0.0808	0.3416
RPS12,LINC00326	133139720	133408132	-0.2013	0.1858	-0.2379	-0.1492
TAAR5,TAAR3	132911899	132928031	-0.202	0.0044	-0.2134	0.007
VNN3,VNN2	133057017	133063684	-0.2058	0.0043	-0.2133	0.0032
SLC22A3,LPAL2	160875494	160886475	-0.2062	0.0029	-0.2134	0.0043
RPS12	133135413	133139610	-0.21	0.0013	-0.2133	0.002
LINC00602	166402014	166403991	-0.2101	0.0013	-0.2133	0.0019
LOC729658	163602773	163612783	-0.2204	0.009	-0.2426	0.0132
NOX3	155715783	155777941	-0.2214	-0.8073	0.3972	0.1887
PLG	161122274	161175730	-0.2233	0.0254	-0.2134	-0.0353
ZBTB2	151684322	151713648	-0.2269	-0.0115	-0.1123	-0.1031
DKFZp451B082	163758941	163769011	-0.2319	0.0046	-0.2426	0.0061
LOC645434	139789339	139796329	-0.2382	0.0013	-0.2415	0.002
TAAR2,TAAR1	132946605	132964960	-0.2958	0.0478	-0.2406	-0.103
NOX3,ARID1B	155778550	157096707	-0.298	-0.8122	0.3184	0.1958
REPS1	139225791	139309903	-0.3075	0.005	-0.2113	-0.1012
SMLR1	131147611	131158670	-0.3134	0.003	-0.2134	-0.103
ENPP1	132128401	132216287	-0.3136	0.0028	-0.2134	-0.103
TULP4,TMEM181	158934145	158955158	-0.3238	0.1601	-0.4297	-0.0542
IL20RA	137320304	137367161	-0.3378	0.005	-0.2415	-0.1013
HIVEP2,LINC01277	143270007	143285637	-0.3426	0.0019	-0.2414	-0.1031
LOC101928461	136950396	136969018	-0.3432	0.0014	-0.2415	-0.1031
MED23	131895144	131950233	-0.3542	0.0026	-0.2406	-0.1162
CNKSR3,SCAF8	154832760	155053362	-0.3733	-0.7883	0.5501	-0.1351
SLC18B1	133089557	133120725	-0.3991	-0.0555	-0.2406	-0.103
PDE7B	136172958	136517545	-0.4708	-0.8698	0.5491	-0.1501
GTF2H5,TULP4	158621844	158732643	-0.4764	-0.1475	-0.2222	-0.1067
CCDC170	151814453	151943295	-0.4964	-0.784	0.3907	-0.1031
ESR1	152010807	152425185	-0.498	-0.8059	0.5499	-0.242
TIAM2	155410556	155577913	-0.542	-0.83	0.391	-0.103
RGS17	153331369	153453044	-0.5529	-0.8136	0.4008	-0.1401
OPRM1	154330641	154474871	-0.5726	-0.8281	0.3907	-0.1352
AGPAT4	161550148	161695750	-0.5818	-0.8696	0.3908	-0.103
MAS1,IGF2R	160330396	160388772	-0.5819	-0.8696	0.3908	-0.1031
C6orf99,RSPH3	159332825	159396919	-0.5837	-0.8263	0.3569	-0.1143
SCAF8,TIAM2	155156709	155409516	-0.5869	-0.8216	0.3946	-0.1599
IGF2R	160389548	160528237	-0.6358	-0.8696	0.391	-0.1572
LPAL2	160887192	160932114	-0.6485	-0.85	0.3045	-0.103
PARK2	161768004	163147788	-0.6623	-0.8723	0.391	-0.181
SLC22A3	160770220	160874098	-0.665	-0.8696	0.3042	-0.0996
LOC102723831,AKAP12	151550702	151559852	-0.7371	-0.6361	0.002	-0.103
MAP7,MAP3K5	136873702	136877044	-0.8044	-0.8073	0.0009	0.002
RSPH3	159397855	159422197	-0.817	-0.8263	0.0028	0.0065
TFB1M,NOX3	155636768	155715385	-0.8291	-0.8073	0.0813	-0.1031
DYNLT1	159057746	159066787	-0.8588	-0.8696	0.0009	0.0099
MAS1	160327134	160329616	-0.8667	-0.8696	0.0009	0.002
ACAT2	160183382	160199426	-0.8733	-0.8696	-0.2134	0.2097
TMEM242	157709734	157745707	-0.8931	-0.8687	0.0596	-0.084
SLC22A2	160636862	160680743	-0.9	-0.8696	-0.2069	0.1765
SNX9	158245345	158367105	-0.9279	-0.8691	-0.22	0.1612
MTHFD1L,LOC102723831	151424379	151516795	-0.9483	-0.7722	-0.0874	-0.0887
ZDHHC14	157803648	158095901	-0.9554	-0.8691	-0.2192	0.1329
EZR	159186958	159239004	-1.0256	-0.8234	-0.2157	0.0135
SYNJ2	158402439	158521159	-1.0498	-0.8696	-0.2846	0.1044
TMEM242,ZDHHC14	157747707	157801186	-1.0524	-0.8691	-0.2155	0.0322
SNX9,SYNJ2	158367223	158401174	-1.1658	-0.8664	-0.1964	-0.103
LPA,PLG	161088918	161122221	-1.1861	-0.8696	-0.2134	-0.1031
ARID1B,TMEM242	157533611	157708876	-1.1881	-0.8684	-0.2166	-0.1031
SERAC1	158529803	158588866	-1.1886	-0.8687	-0.2133	-0.1066
LPA	160952816	161088399	-1.1928	-0.8696	-0.2134	-0.1098
ZDHHC14,SNX9	158096328	158242901	-1.2026	-0.8696	-0.2155	-0.1175
LOC102724053,SOD2	159818688	160099143	-1.204	-0.8696	-0.5291	0.1947
SLC22A1,SLC22A2	160581374	160636637	-1.2219	-0.8696	-0.2133	-0.139
ARID1B	157098224	157532746	-1.2424	-0.87	-0.2291	-0.1433
TULP4	158732819	158933084	-1.4872	-0.8263	-0.5434	-0.1175

## Sheet: Supplementary Table S3C
Supplementary Table S3C: Region-based LOD Scores of 42-44 Linked Haplotype
								Legend
Gene	Start	Stop	CLOD	Fam 42 LOD	Fam 44 LOD				Region = Region that LOD scores are calculated on (either gene or intergenic region)
PLG,MAP3K4	161176256	161411449	1.8217	0.5297	1.292				Start = Start position of the region in bp
MAP3K4	161411973	161539375	1.8216	0.5351	1.2865				Stop = Stop position of the region in bp
LPA,PLG	161088918	161122221	1.7636	0.4711	1.2925				CLOD = Cumulative LOD score across families 42 and 44
LPA	160952816	161088399	1.175	-0.1193	1.2943				Fam 42 LOD = LOD score of the region for family 42
SASH1	148663071	148874177	1.1048	0.3019	0.8029				Fam 44 LOD = LOD score of the region for family 44
MAP3K5	136878046	137112633	1.0859	0.1601	0.9258
SLC22A2,SLC22A3	160681063	160768212	0.8933	0.5338	0.3595
EPM2A	145945442	146055568	0.8598	0.1247	0.7351
HBS1L,MYB	135377091	135500773	0.7247	0.3012	0.4235
IFNGR1,OLIG3	137542091	137812323	0.7166	0.2981	0.4185
SLC22A3	160770220	160874098	0.7032	0.5272	0.176
PNLDC1,MAS1	160242841	160326840	0.6877	0.1467	0.541
SCAF8,TIAM2	155156709	155409516	0.6499	-0.1441	0.794
RAET1L,ULBP3	150347787	150384648	0.6106	-0.0478	0.6584
GRM1,RAB32	146759992	146863522	0.5679	0.3006	0.2673
IYD,PLEKHG1	150726899	150918964	0.5607	-0.1441	0.7048
CTGF,LINC01013	132273991	132453620	0.5216	0.2948	0.2268
SOD2	160099260	160115127	0.4827	0.4718	0.0109
SYNE1,MYCT1	152959648	153017986	0.4749	0.1486	0.3263
SGK1,LOC101928231	134640332	134749096	0.4605	-0.1404	0.6009
GPR126	142623952	142767890	0.3995	0.533	-0.1335
PARK2	161768004	163147788	0.3783	-0.5611	0.9394
STXBP5,SAMD5	147713151	147828738	0.3773	0.2893	0.088
PLEKHG1	150920008	151165708	0.3679	0.1919	0.176
IYD	150689705	150726746	0.3162	-0.1374	0.4536
ADGB,STXBP5-AS1	147137739	147161306	0.3134	0.1727	0.1407
TAAR5,TAAR3	132911899	132928031	0.31	0.3006	0.0094
LOC102723649	137985859	137996660	0.3022	0.2966	0.0056
RGS17,OPRM1	153453501	154330629	0.2529	-0.6933	0.9462
LOC100507462	139045368	139094638	0.243	0.3759	-0.1329
LINC01010	134758900	134825313	0.2214	-0.144	0.3654
SFT2D1	166732587	166755480	0.1914	0.3247	-0.1333
ESR1	152010807	152425185	0.1851	-0.144	0.3291
PLG	161122274	161175730	0.1813	0.0339	0.1474
ECT2L	139116706	139224903	0.1808	0.3028	-0.122
NMBR	142395799	142410797	0.1806	0.0309	0.1497
TFB1M,NOX3	155636768	155715385	0.177	0.0339	0.1431
ADAT2	143743617	143771144	0.1734	0.0353	0.1381
SLC2A12,HMGA1P7	134375588	134434008	0.1722	0.3025	-0.1303
VTA1	142467387	142542136	0.172	0.3056	-0.1336
SHPRH,GRM1	146286620	146347836	0.1718	0.3022	-0.1304
LOC153910,HIVEP2	142960190	143071171	0.1712	0.3044	-0.1332
ENPP3	131957905	132069529	0.1709	0.3041	-0.1332
AKAP7	131456023	131605434	0.17	0.3028	-0.1328
PEX3	143772311	143812033	0.1687	0.3022	-0.1335
TAAR1,VNN1	132968257	133000800	0.1658	0.2994	-0.1336
SLC18B1	133089557	133120725	0.1658	0.2984	-0.1326
VNN3	133043016	133056638	0.1646	0.2975	-0.1329
LINC01013	132454127	132491083	0.1641	-0.1216	0.2857
SAMD5	147830073	147892127	0.1631	0.296	-0.1329
PERP,KIAA1244	138430056	138482043	0.1627	0.296	-0.1333
GPR126,LOC153910	142768536	142846565	0.1625	0.2957	-0.1332
AIG1	143380517	143662386	0.1555	0.2994	-0.1439
NHSL1,FLJ46906	138894852	139011415	0.1543	0.3044	-0.1501
LOC645434,LOC100132735	139797319	140090782	0.1486	0.2869	-0.1383
LINC00326,EYA4	133428933	133561012	0.1474	0.3009	-0.1535
TCF21,TBPL1	134217699	134272072	0.147	0.2581	-0.1111
MPC1	166777599	166795768	0.147	0.1069	0.0401
OR2B6,ZNF165	27969004	27970391	0.1457	0.0026	0.1431
SLC22A1,SLC22A2	160581374	160636637	0.143	-0.1219	0.2649
TFB1M	155577374	155636071	0.142	-0.1083	0.2503
MOXD1	132616654	132722837	0.1405	0.3025	-0.162
CCDC28A	139094937	139115303	0.1366	0.0054	0.1312
REPS1	139225791	139309903	0.1327	0.2599	-0.1272
LOC100507557	146057217	146207657	0.1318	0.3	-0.1682
STX11,UTRN	144514425	144611581	0.1255	0.2583	-0.1328
MIR548A1,LOC101928519	18726551	18771945	0.1252	0	0.1252
LOC153910	142846707	142960001	0.1222	0.2963	-0.1741
LOC102723649,LOC100507406	137996779	138049711	0.1219	0.3022	-0.1803
LOC100507477,MIR3668	140415973	140524081	0.1207	0.3	-0.1793
MAP7	136662686	136872558	0.1136	0.2939	-0.1803
LINC00271,PDE7B	136013534	136171566	0.1135	0.2969	-0.1834
SNX9	158245345	158367105	0.1078	-0.144	0.2518
AGPAT4	161550148	161695750	0.1071	0.3602	-0.2531
STXBP5	147525846	147712079	0.1067	0.3012	-0.1945
HBS1L	135280519	135376861	0.1045	0.2981	-0.1936
LOC101928231	134749220	134799829	0.1038	-0.0696	0.1734
PPIL4,GINM1	149868764	149886258	0.0962	0.0028	0.0934
TNFAIP3,PERP	138209785	138408573	0.0905	0.3019	-0.2114
EZR	159186958	159239004	0.0842	-0.144	0.2282
IGF2R	160389548	160528237	0.0778	0.5347	-0.4569
STX11	144473172	144513733	0.0749	-0.0468	0.1217
ME1,PRSS35	84156904	84158736	0.0673	0.0609	0.0064
FNDC1	159591403	159693967	0.0643	-0.1185	0.1828
FNDC1,LOC102724053	159694344	159803460	0.0577	-0.1441	0.2018
RPS6KA2-IT1	166874223	166878799	0.057	-0.0528	0.1098
OLIG3,LOC102723649	137816766	137985652	0.0566	0.3009	-0.2443
EYA4	133561646	133849868	0.0552	0.3022	-0.247
LINC01277,AIG1	143359846	143379481	0.0483	0.0341	0.0142
CLDN20	155585154	155597644	0.0456	0.0369	0.0087
TTLL2	167738595	167744473	0.043	0.006	0.037
LOC645434	139789339	139796329	0.0385	0.0339	0.0046
RPS12	133135413	133139610	0.0384	0.0339	0.0045
CLDN20,TFB1M	155585868	155596700	0.0322	0.0035	0.0287
ULBP1	150284216	150295428	0.0306	0.0132	0.0174
LOC100289495	166756130	166765805	0.0262	0.0098	0.0164
LINC01010,LOC101928231	134759242	134798147	0.0242	-0.1051	0.1293
DKFZp451B082	163758941	163769011	0.0219	0.0082	0.0137
AHI1	135604158	135818135	0.0182	0.3022	-0.284
GMDS	1737852	1738222	0.0177	0.0118	0.0059
LOC102723831,AKAP12	151550702	151559852	0.0174	0.0057	0.0117
CEP85L	118817068	118907285	0.0165	0.0056	0.0109
SLC22A3,LPAL2	160875494	160886475	0.0159	0.0062	0.0097
LOC100507477,LOC103352541	140299690	140311604	0.0153	0.0057	0.0096
MIR3668	140525948	140527294	0.0152	0.0059	0.0093
TAAR9,TAAR8	132861957	132872759	0.0147	0.0055	0.0092
FUCA2	143815127	143833897	0.0147	0.0055	0.0092
LATS1,NUP43	150041404	150043021	0.0146	0.0067	0.0079
RSPH3,TAGAP	159422463	159454387	0.0123	-0.131	0.1433
GMDS-AS1	2376528	2376667	0.0113	0.0043	0.007
RAET1E	150209717	150212003	0.0109	0.0041	0.0068
FLJ46906	139011836	139019029	0.0105	0.0039	0.0066
SLC35D3	137242532	137247466	0.0099	0.0026	0.0073
LOC100289495,MPC1	166766142	166777115	0.0088	0.0033	0.0055
PKIB	122842333	122842439	0.0086	0	0.0086
ZC3H12D,PPIL4	149807523	149823899	0.0086	0.0031	0.0055
KATNA1,LATS1	149972087	149977802	0.0083	0.0031	0.0052
FBXO30	146125535	146126580	0.0082	0.0031	0.0051
TAAR9	132859437	132860742	0.008	0.003	0.005
VNN2,SLC18B1	133085941	133088814	0.0079	0.0026	0.0053
PERP	138408768	138429651	0.0079	0.003	0.0049
GRIK2	101961643	101961806	0.0079	0.0031	0.0048
TFAP2B,PKHD1	51272494	51275121	0.0078	0.0032	0.0046
NONE,HACE1	104794722	105107744	0.0078	0.0032	0.0046
IGF2R,SLC22A1	160528634	160541348	0.0078	0.0029	0.0049
SF3B5	144415154	144417730	0.0077	0.0029	0.0048
TCF21	134210598	134217540	0.0076	0.0028	0.0048
PRR18	166718235	166722714	0.0076	0.0034	0.0042
GFOD1,SIRT5	13521802	13560418	0.0075	0.0032	0.0043
LOC102723883,LOC101928280	68848649	68848649	0.0075	0	0.0075
RIMS1	72854149	72854283	0.0075	0.003	0.0045
TAAR6,TAAR5	132893712	132908654	0.0075	0.0027	0.0048
LOC101928461	136950396	136969018	0.0075	0.0028	0.0047
CTGF	132268964	132273264	0.0074	0.0028	0.0046
TAAR3,TAAR2	132931457	132937091	0.0074	0.0028	0.0046
HEBP2	138724658	138735517	0.0074	0.0028	0.0046
ME1	84102004	84102550	0.0073	0.0027	0.0046
PDSS2	107620876	107620876	0.0073	0.0027	0.0046
TAAR5	132908879	132911719	0.0073	0.0027	0.0046
HMGA1P7	134434329	134439764	0.0073	0.0027	0.0046
NHEG1	137302669	137313467	0.0073	0.0027	0.0046
RPS18P9	149914345	149915398	0.0073	0.0026	0.0047
DYNLT1,SYTL3	159067429	159069940	0.0073	0.0027	0.0046
MTCH1	36936483	36946458	0.0072	0.0027	0.0045
ARG1,MED23	131895920	131904719	0.0072	0.0027	0.0045
MAP7,MAP3K5	136873702	136877044	0.0072	0.0027	0.0045
MAP3K5,PEX7	137114758	137141890	0.0072	0.0027	0.0045
CITED2	139692511	139696429	0.0072	0.0027	0.0045
MAS1	160327134	160329616	0.0072	0.0027	0.0045
OPRM1	154330641	154474871	0.0071	-0.144	0.1511
SLC35A1	88193552	88193852	0.0071	0.0029	0.0042
HYMAI	144324316	144329814	0.007	0.0027	0.0043
LPAL2,LPA	160934608	160949428	0.007	0.0026	0.0044
RUNX2	45459922	45459922	0.0069	0.0026	0.0043
GUSBP4,NONE	58294828	58779473	0.0069	0.0016	0.0053
RPS12,SNORA33	133139026	133139334	0.0069	0.0026	0.0043
ALDH8A1,HBS1L	135272356	135280438	0.0069	0.0026	0.0043
PCMT1,LRP11	150133601	150138734	0.0069	0.0026	0.0043
SYNE1-AS1	152701996	152702821	0.0069	0.0026	0.0043
MTRF1L,RGS17	153324991	153330468	0.0069	0.0026	0.0043
LOC729603	160514246	160517094	0.0069	0.0026	0.0043
AGPAT4-IT1	161582291	161582693	0.0069	0.0026	0.0043
MIR4465	141004533	141005338	0.0067	0.0027	0.004
ZBED9,LOC401242	28557129	28744045	0.0067	0.0022	0.0045
HLA-A,HCG9	29936065	29936408	0.0066	0.0024	0.0042
TREM1,NCR2	41276004	41276004	0.0066	0.0025	0.0041
RNGTT,PNRC1	89679114	89705618	0.0066	0.0025	0.0041
MIR3918;EZR,SYTL3	159185959	159186692	0.0064	0.0026	0.0038
LINC00602	166402014	166403991	0.0064	0.0026	0.0038
EYS	65036207	66043219	0.0063	0.0022	0.0041
MRAP2,CEP162	84816620	84816630	0.0058	0.0027	0.0031
NT5DC1	116565504	116566438	0.0052	0.0019	0.0033
SNHG5,HTR1E	86685341	87236398	0.005	0.0003	0.0047
OR12D2,OR11A1	29378439	29378620	0.0046	0	0.0046
TPBG,UBE3D	83195087	83195206	0.0044	0.0002	0.0042
ACOT13	24677968	24679178	0.0042	0.0015	0.0027
LINC01312	134142442	134174768	0.0038	0.0031	0.0007
LACE1	108699897	108699897	0.0018	0	0.0018
NOTCH4,C6orf10	32223632	32223785	0.0016	0	0.0016
BCKDHB	80895635	81006968	0.0016	0	0.0016
NHSL1	138742249	138894561	0.0014	0.3037	-0.3023
BEND6	56840346	56840553	0.0007	0	0.0007
PLAGL1	144260703	144384404	0.0001	0.2597	-0.2596
WTAP,LOC100129518	160178665	160180003	-0.0009	-0.144	0.1431
HEBP2,NHSL1	138737676	138742172	-0.002	0.0028	-0.0048
ESR1,SYNE1	152425582	152441587	-0.0024	0.0029	-0.0053
MIR2113,POU3F2	98980113	99064295	-0.0025	0.0026	-0.0051
LOC100507406,LOC100130476	138063120	138143632	-0.0031	0.3016	-0.3047
VIP	153071646	153080640	-0.0038	-0.0085	0.0047
MEI4,IRAK1BP1	78898738	79567719	-0.0041	-0.0086	0.0045
NUP43	150045436	150067989	-0.0042	-0.0086	0.0044
TTLL2,TCP10	167761543	167763664	-0.0087	-0.0257	0.017
HMGA1P7,SGK1	134440071	134489307	-0.0088	0.1239	-0.1327
SLC18B1,RPS12	133120782	133134472	-0.0175	-0.0272	0.0097
LOC100130476	138144078	138188713	-0.0176	0.1155	-0.1331
PRR18,SFT2D1	166722871	166732338	-0.0216	-0.0086	-0.013
TAAR2	132937346	132946302	-0.0224	0.1103	-0.1327
ARG1	131893463	131900390	-0.0228	-0.0274	0.0046
TULP4,TMEM181	158934145	158955158	-0.0271	-0.1215	0.0944
HIVEP2	143072350	143265487	-0.0282	0.3037	-0.3319
STXBP5-AS1	147161829	147524615	-0.0292	0.3022	-0.3314
LINC00271	135819737	136012781	-0.0309	0.3022	-0.3331
PNLDC1	160220575	160242684	-0.0357	0.0891	-0.1248
RPS6KA2,RPS6KA2-AS1	167276822	167308627	-0.0391	-0.0488	0.0097
IL20RA,IL22RA2	137367368	137463567	-0.0456	0.3044	-0.35
LINC01013,MOXD1	132491930	132615068	-0.0484	0.1561	-0.2045
ENPP3,ENPP1	132069917	132127669	-0.0509	0.2994	-0.3503
TXLNB	139560803	139614025	-0.0526	0.0749	-0.1275
TAAR2,TAAR1	132946605	132964960	-0.0561	0.0979	-0.154
RPS12,LINC00326	133139720	133408132	-0.0668	0.2994	-0.3662
PDE7B	136172958	136517545	-0.067	0.3012	-0.3682
MOXD1,STX7	132724116	132777463	-0.0673	0.0229	-0.0902
RAET1L	150340526	150347617	-0.0731	0.0234	-0.0965
LOC729658	163602773	163612783	-0.0831	0.0176	-0.1007
SYNJ2,SERAC1	158521300	158529418	-0.0892	0.044	-0.1332
KIAA1244	138483517	138665889	-0.0924	0.3034	-0.3958
LOC102723831	151517104	151549416	-0.0959	0.0339	-0.1298
LINC01010,LOC101928304	134826329	134845441	-0.0967	0.034	-0.1307
TMEM242,ZDHHC14	157747707	157801186	-0.0969	0.0341	-0.131
MIR3668,MIR4465	140527653	141001882	-0.0971	0.3012	-0.3983
PEX7,SLC35D3	137236179	137242096	-0.0985	0.0341	-0.1326
TAAR3	132928683	132931433	-0.0989	0.034	-0.1329
PCMT1	150070095	150133188	-0.0993	0.034	-0.1333
MTFR2	136551487	136572311	-0.0994	0.034	-0.1334
SLC22A1	160543080	160580496	-0.0996	0.0338	-0.1334
KATNA1	149916013	149969663	-0.0996	0.0339	-0.1335
ENPP1,CTGF	132217556	132267818	-0.1013	-0.1439	0.0426
ULBP3	150384827	150390213	-0.1044	-0.1097	0.0053
LOC102724201,TBX18	85422442	85430017	-0.1046	-0.109	0.0044
TMEM242	157709734	157745707	-0.107	0.0198	-0.1268
TNFAIP3	138189515	138203742	-0.1115	-0.1216	0.0101
SLC2A12	134308725	134374673	-0.1117	0.0717	-0.1834
ULBP2	150262994	150271331	-0.1125	-0.1216	0.0091
IFNGR1	137517772	137541521	-0.1126	-0.1217	0.0091
VNN3,VNN2	133057017	133063684	-0.1127	-0.1215	0.0088
LTV1	144165285	144184227	-0.1129	-0.1217	0.0088
OLIG3	137812582	137816345	-0.1149	0.0031	-0.118
VNN1,VNN3	133036214	133042840	-0.115	0.0184	-0.1334
HIVEP2,LINC01277	143270007	143285637	-0.1158	-0.1216	0.0058
FLJ46906,LOC100507462	139019628	139044135	-0.1164	-0.1212	0.0048
PBOV1	138537432	138539556	-0.1168	-0.1214	0.0046
MRPL18	160211554	160219973	-0.1175	-0.1221	0.0046
C6orf211	151774339	151792026	-0.1176	0.0083	-0.1259
LOC100132735,LOC100507477	140182769	140296384	-0.1203	0.2024	-0.3227
ABRACL	139349151	139365330	-0.1209	0.0064	-0.1273
VNN2	133064474	133085461	-0.1233	0.0053	-0.1286
WTAP	160147058	160178323	-0.1272	0.0031	-0.1303
TAAR1	132965208	132968095	-0.1274	0.0055	-0.1329
LRP11	150139112	150184208	-0.1274	0.0053	-0.1327
AKAP12,ZBTB2	151681431	151683721	-0.1274	0.0028	-0.1302
KATNBL1P6	147122877	147124497	-0.1276	0.0052	-0.1328
LOC101928661	146914674	146919485	-0.1277	0.0052	-0.1329
DYNLT1	159057746	159066787	-0.1277	0.0028	-0.1305
LOC101929122	159585941	159590086	-0.1278	0.0031	-0.1309
TAAR8,TAAR6	132876414	132890341	-0.1279	0.0055	-0.1334
EZR-AS1,OSTCP1	159244973	159261067	-0.128	-0.1439	0.0159
MTFR2,BCLAF1	136572881	136576589	-0.1282	0.0026	-0.1308
VNN1	133001279	133036058	-0.1283	0.0053	-0.1336
LOC101928304	134846112	134862110	-0.1286	0.0041	-0.1327
MTRF1L	153307949	153324546	-0.1298	0.0031	-0.1329
IL22RA2	137464218	137495707	-0.1299	0.0028	-0.1327
LINC00326	133409004	133428350	-0.13	0.0032	-0.1332
CAHM	163833269	163834157	-0.13	0.0027	-0.1327
MYB	135502040	135541194	-0.1303	0.0032	-0.1335
BCLAF1	136577200	136609564	-0.1304	-0.144	0.0136
RAET1G	150238160	150245203	-0.1305	0.0028	-0.1333
OSTCP1,C6orf99	159279904	159308521	-0.1307	0.003	-0.1337
RSPH3	159397855	159422197	-0.1307	-0.1439	0.0132
ZBTB2,RMND1	151713902	151724756	-0.1327	-0.0086	-0.1241
ULBP2,ULBP1	150271944	150283907	-0.1353	-0.144	0.0087
PHACTR2,LTV1	144153461	144162284	-0.1356	0.0058	-0.1414
RAET1K	150318281	150327202	-0.1358	-0.0085	-0.1273
PDE7B,MTFR2	136520019	136551127	-0.1386	0.0053	-0.1439
OSTCP1	159261360	159279553	-0.1389	-0.1441	0.0052
IL22RA2,IFNGR1	137496672	137517491	-0.1393	-0.0086	-0.1307
PHACTR2	143928437	144153292	-0.1399	0.3012	-0.4411
L3MBTL3	130400092	130463194	-0.142	0.0916	-0.2336
UTRN,EPM2A	145175208	145945278	-0.1422	0.3025	-0.4447
C6orf118	165692224	165724052	-0.1465	0.0673	-0.2138
PLEKHG1,MTHFD1L	151165830	151185555	-0.149	-0.1439	-0.0051
SLC22A2	160636862	160680743	-0.1505	0.1674	-0.3179
RMND1	151725206	151773206	-0.1523	-0.1097	-0.0426
TAB2,ZC3H12D	149733871	149767105	-0.1533	-0.0275	-0.1258
LOC100128176	149275403	149285768	-0.1594	-0.0265	-0.1329
LOC285740,PHACTR2	143891950	143928313	-0.1625	0.1164	-0.2789
LOC285740	143874639	143891420	-0.1679	0.033	-0.2009
RAET1G,ULBP2	150245907	150262097	-0.1736	0.0057	-0.1793
ULBP1,RAET1K	150296333	150318085	-0.1957	-0.0168	-0.1789
ZBTB2	151684322	151713648	-0.2251	-0.144	-0.0811
SERAC1	158529803	158588866	-0.2286	-0.0525	-0.1761
LOC102724053	159803605	159817950	-0.2297	-0.0994	-0.1303
IPCEF1,CNKSR3	154679267	154725382	-0.2348	-0.1083	-0.1265
NMBR,VTA1	142411084	142466756	-0.2372	-0.0217	-0.2155
BCLAF1,MAP7	136612727	136660065	-0.2383	-0.1053	-0.133
GINM1	149886781	149911554	-0.2394	0.0067	-0.2461
ZC2HC1B	144186862	144259991	-0.25	-0.1217	-0.1283
ALDH8A1	135237686	135272087	-0.2516	-0.1142	-0.1374
RAET1E-AS1	150186524	150240083	-0.2524	-0.1216	-0.1308
TAGAP	159454897	159466214	-0.2526	-0.122	-0.1306
TAAR6	132890748	132893004	-0.2545	-0.1213	-0.1332
LPAL2	160887192	160932114	-0.2545	-0.1212	-0.1333
CNKSR3,SCAF8	154832760	155053362	-0.2546	-0.1216	-0.133
TBPL1	134272398	134308187	-0.255	-0.1216	-0.1334
MAP3K4,AGPAT4	161539520	161550032	-0.2552	-0.1221	-0.1331
LATS1	149978321	150039720	-0.2553	-0.1217	-0.1336
GSTA3,GSTA4	52782096	52783041	-0.2587	-0.1195	-0.1392
TXLNB,CITED2	139614425	139692331	-0.2604	-0.0827	-0.1777
STX7	132778215	132835314	-0.2608	-0.1266	-0.1342
LOC102724053,SOD2	159818688	160099143	-0.2629	0.2493	-0.5122
RAET1K,RAET1L	150327994	150340075	-0.2682	0.0174	-0.2856
C6orf99,RSPH3	159332825	159396919	-0.2694	-0.1218	-0.1476
PACRG-AS1,DKFZp451B082	163746575	163758350	-0.2714	-0.1431	-0.1283
FUCA2,LOC285740	143834441	143873045	-0.2735	-0.141	-0.1325
PLAGL1,SF3B5	144387094	144414868	-0.2742	-0.144	-0.1302
MED23,ENPP3	131950401	131956670	-0.2744	-0.1438	-0.1306
GTF2H5	158589608	158620608	-0.2768	-0.144	-0.1328
MTHFD1L,LOC102723831	151424379	151516795	-0.2769	-0.144	-0.1329
PEX7	137142886	137235988	-0.2769	-0.1441	-0.1328
CITED2,LOC645434	139697704	139789100	-0.2771	-0.1439	-0.1332
KIAA1244,HEBP2	138666838	138724013	-0.2774	-0.1441	-0.1333
SF3B5,STX11	144417941	144469837	-0.2774	-0.144	-0.1334
CCDC170,ESR1	151943434	152010561	-0.2818	-0.1072	-0.1746
TMEM200A	130687773	130765164	-0.2819	-0.1218	-0.1601
PPIL4	149825264	149866780	-0.2829	-0.1439	-0.139
MPC1,RPS6KA2	166798478	166821813	-0.2834	-0.1438	-0.1396
GTF2H5,TULP4	158621844	158732643	-0.2838	-0.1441	-0.1397
TMEM181	158956658	159056490	-0.2852	-0.144	-0.1412
C6orf118,PDE10A	165724152	165739330	-0.287	-0.1215	-0.1655
ENPP1	132128401	132216287	-0.2884	-0.1441	-0.1443
TARID	133824071	134210037	-0.2946	0.3019	-0.5965
MYB,AHI1	135541395	135604070	-0.2973	-0.1213	-0.176
MED23	131895144	131950233	-0.3045	-0.1216	-0.1829
C6orf211,CCDC170	151793095	151813483	-0.306	0.0534	-0.3594
TULP4	158732819	158933084	-0.3104	0.1424	-0.4528
SHPRH	146208120	146286037	-0.3153	-0.1441	-0.1712
LOC100132735	140092048	140182546	-0.3182	-0.1441	-0.1741
MYCT1	153018034	153046455	-0.3232	-0.1439	-0.1793
NOX3	155715783	155777941	-0.3234	-0.1439	-0.1795
CNKSR3	154725814	154832680	-0.3252	-0.1439	-0.1813
LOC100507406	138050926	138061071	-0.339	-0.0086	-0.3304
HECA	139457971	139502639	-0.3396	-0.1217	-0.2179
SAMD3	130464449	130686525	-0.3567	0.3016	-0.6583
TMEM200A,SMLR1	130765415	131147496	-0.3626	0.306	-0.6686
SLC35D3,NHEG1	137248032	137302244	-0.3671	-0.144	-0.2231
AGPAT4,PARK2	161696163	161767537	-0.3814	-0.1438	-0.2376
EPB41L2	131159590	131385227	-0.383	0.3034	-0.6864
AKAP12	151560193	151680678	-0.3862	-0.1137	-0.2725
SCAF8	155053583	155156221	-0.3925	-0.1439	-0.2486
REPS1,ABRACL	139311050	139348484	-0.3927	-0.1398	-0.2529
AKAP7,ARG1	131609065	131893281	-0.3959	-0.1439	-0.252
RPS6KA2	166822018	167276041	-0.397	0.2491	-0.6461
SYNJ2	158402439	158521159	-0.4025	-0.1398	-0.2627
SNX9,SYNJ2	158367223	158401174	-0.4027	-0.1216	-0.2811
UTRN	144611924	145175023	-0.4122	0.2991	-0.7113
TAB2	149538248	149733664	-0.4204	-0.1216	-0.2988
MAS1,IGF2R	160330396	160388772	-0.4224	0.0095	-0.4319
LOC100507477	140296625	140415139	-0.4279	-0.1215	-0.3064
LINC01312,TARID	134143009	134172296	-0.4307	0.0516	-0.4823
PPP1R14C	150463376	150572489	-0.4318	-0.1043	-0.3275
IPCEF1,OPRM1	154481394	154567863	-0.445	-0.1438	-0.3012
IL20RA	137320304	137367161	-0.4459	-0.1439	-0.302
DKFZp451B082,CAHM	163769090	163832755	-0.446	-0.6783	0.2323
GRM1	146348747	146759661	-0.4466	0.3025	-0.7491
LOC101928304,ALDH8A1	134862537	135237359	-0.4479	0.3019	-0.7498
ULBP3,PPP1R14C	150391236	150462959	-0.4479	-0.1441	-0.3038
HDGFL1,NRSN1	23867227	24042393	-0.4612	0.0044	-0.4656
C6orf99	159308709	159332286	-0.465	-0.0476	-0.4174
LOC101929297	166649499	166671337	-0.467	-0.2919	-0.1751
ACAT2	160183382	160199426	-0.4716	-0.1218	-0.3498
LINC00473,LINC00602	166401103	166401512	-0.4748	0.0341	-0.5089
ADGB	146920271	147136528	-0.475	0.3056	-0.7806
LOC101929297,PRR18	166671718	166718042	-0.4846	-0.1439	-0.3407
VTA1,GPR126	142543600	142621947	-0.4896	0.2097	-0.6993
UST,TAB2	149399194	149537327	-0.5053	-0.3355	-0.1698
MYCT1,VIP	153046842	153070786	-0.5086	-0.144	-0.3646
QKI,C6orf118	164000948	165691761	-0.5146	0.2318	-0.7464
ZDHHC14	157803648	158095901	-0.5195	-0.1439	-0.3756
SAMD5,SASH1	147892247	148661889	-0.5217	0.3056	-0.8273
LINC01277	143286922	143359128	-0.5227	0.3031	-0.8258
MRPL18,TCP1	160210871	160211485	-0.5276	0.0026	-0.5302
MIR4465,NMBR	141006355	142395720	-0.5286	0.3041	-0.8327
STX7,TAAR9	132835568	132858174	-0.5298	-0.0899	-0.4399
SGK1	134490957	134639713	-0.5462	-0.1438	-0.4024
SOD2,WTAP	160115421	160146670	-0.5567	-0.122	-0.4347
MTHFD1L	151186517	151423606	-0.5574	-0.1438	-0.4136
PPP1R14C,IYD	150572568	150688732	-0.5821	-0.1438	-0.4383
AIG1,ADAT2	143662850	143742264	-0.5952	-0.1408	-0.4544
RAB32	146863903	146876819	-0.6179	-0.1441	-0.4738
CCDC170	151814453	151943295	-0.6224	-0.1441	-0.4783
ARID1B	157098224	157532746	-0.6229	0.1931	-0.816
T,LOC101929297	166583207	166649210	-0.624	-0.1187	-0.5053
LOC101929239	163464719	163474312	-0.6411	-0.1216	-0.5195
PDE10A	165740447	166073277	-0.6499	-0.1439	-0.506
GOPC,LOC101927919	117940061	117941035	-0.6503	0.0031	-0.6534
AIRN	160424760	160428561	-0.6574	-0.1438	-0.5136
QKI	163837341	164000396	-0.6723	-0.1409	-0.5314
HECA,TXLNB	139503128	139559885	-0.697	0.074	-0.771
TIAM2	155410556	155577913	-0.7148	-0.3192	-0.3956
LINC00473	166336597	166400854	-0.7371	-0.1438	-0.5933
SYNE1	152441843	152959404	-0.7394	-0.1441	-0.5953
PACRG-AS1	163731037	163746335	-0.7786	-0.1406	-0.638
PDE10A,LINC00473	166077817	166335959	-0.7802	-0.144	-0.6362
FBXO5	153290809	153305563	-0.7826	-0.1403	-0.6423
TCP1	160199687	160210599	-0.7833	0.0056	-0.7889
T	166570156	166582979	-0.7843	-0.144	-0.6403
EPB41L2,AKAP7	131385986	131455518	-0.8172	-0.1217	-0.6955
SYTL3	159070442	159185563	-0.8532	-0.144	-0.7092
VIP,FBXO5	153082355	153287231	-0.8562	-0.1439	-0.7123
IPCEF1	154476318	154678347	-0.859	-0.1218	-0.7372
RGS17	153331369	153453044	-0.8611	-0.2099	-0.6512
SMLR1	131147611	131158670	-0.876	-0.1441	-0.7319
ZC3H12D	149767921	149806924	-0.8984	-0.0543	-0.8441
ARID1B,TMEM242	157533611	157708876	-0.8994	-0.1407	-0.7587
RAB32,LOC101928661	146879427	146914246	-0.9036	-0.1203	-0.7833
SASH1,UST	148874209	149066706	-0.9046	-0.144	-0.7606
ABRACL,HECA	139366340	139455233	-0.9056	-0.1217	-0.7839
UST	149067372	149399100	-0.9156	-0.1441	-0.7715
PACRG	163148166	163735945	-0.9306	-0.2939	-0.6367
ZDHHC14,SNX9	158096328	158242901	-1.029	-0.2996	-0.7294
TAGAP,LOC101929122	159467351	159585252	-1.0825	-0.6504	-0.4321
NOX3,ARID1B	155778550	157096707	-1.2042	-0.2552	-0.949
LINC00602,T	166404335	166570112	-1.4801	-0.6555	-0.8246

## Sheet: Supplementary Table S3D
Supplementary Table S3D: Region-based LOD Scores of 47-59 Linked Haplotype
Gene	Start	Stop	CLOD	Fam 47 LOD	Fam 59 LOD			Legend
ARID1B	157098224	157532746	1.5791	0.8132	0.7659				Region = Region that LOD scores are calculated on (either gene or intergenic region)
ZDHHC14	157803648	158095901	1.5774	0.8126	0.7648				Start = Start position of the region in bp
NOX3,ARID1B	155778550	157096707	1.5758	0.8139	0.7619				Stop = Stop position of the region in bp
NOX3	155715783	155777941	1.5735	0.8127	0.7608				CLOD = Cumulative LOD score across families 47 and 59
RGS17,OPRM1	153453501	154330629	1.345	0.5806	0.7644				Fam 47 LOD = LOD score of the region for family 47
CNKSR3,SCAF8	154832760	155053362	1.3377	0.5798	0.7579				Fam 59 LOD = LOD score of the region for family 59
OPRM1	154330641	154474871	1.3172	0.5517	0.7655
ZDHHC14,SNX9	158096328	158242901	1.3162	0.551	0.7652
SCAF8,TIAM2	155156709	155409516	1.3088	0.5538	0.755
SYNE1	152441843	152959404	1.2691	0.556	0.7131
RGS17	153331369	153453044	1.26	0.5519	0.7081
IPCEF1	154476318	154678347	1.222	0.4587	0.7633
SNX9	158245345	158367105	1.1469	0.8124	0.3345
SCAF8	155053583	155156221	1.0429	0.5539	0.489
GTF2H5,TULP4	158621844	158732643	0.8726	0.7955	0.0771
VIP,FBXO5	153082355	153287231	0.8632	0.5519	0.3113
CNKSR3	154725814	154832680	0.8193	0.3835	0.4358
VTA1,GPR126	142543600	142621947	0.7923	0.5927	0.1996
MTHFD1L	151186517	151423606	0.7571	0.5507	0.2064
ZC2HC1B	144186862	144259991	0.7487	0.552	0.1967
CCDC170	151814453	151943295	0.7487	0.5519	0.1968
IPCEF1,OPRM1	154481394	154567863	0.7362	0.3835	0.3527
SYNJ2	158402439	158521159	0.6966	0.5284	0.1682
UST,TAB2	149399194	149537327	0.6961	0.3835	0.3126
PPP1R14C	150463376	150572489	0.6781	0.6124	0.0657
AGPAT4,PARK2	161696163	161767537	0.6217	0.3119	0.3098
TIAM2	155410556	155577913	0.6164	0.3835	0.2329
PHACTR2	143928437	144153292	0.5822	0.3832	0.199
ULBP2	150262994	150271331	0.5801	0.3833	0.1968
ARID1B,TMEM242	157533611	157708876	0.5765	0.326	0.2505
LOC101929297	166649499	166671337	0.5641	0.2782	0.2859
SERAC1	158529803	158588866	0.5605	0.551	0.0095
LOC101928661	146914674	146919485	0.5602	0.5536	0.0066
SYNJ2,SERAC1	158521300	158529418	0.4896	0.0007	0.4889
C6orf99	159308709	159332286	0.4758	0.2323	0.2435
IYD	150689705	150726746	0.4619	0.5519	-0.09
SHPRH	146208120	146286037	0.4426	0.6254	-0.1828
LOC153910,HIVEP2	142960190	143071171	0.4222	0.5676	-0.1454
SLC22A2	160636862	160680743	0.4113	0.359	0.0523
C6orf211,CCDC170	151793095	151813483	0.4044	0.3831	0.0213
ULBP1	150284216	150295428	0.3976	0.3836	0.014
PHACTR2,LTV1	144153461	144162284	0.3897	0.3835	0.0062
LPA,PLG	161088918	161122221	0.384	0.184	0.2
TMEM242	157709734	157745707	0.3806	-0.3762	0.7568
TAAR2,TAAR1	132946605	132964960	0.3706	0.174	0.1966
GPR126,LOC153910	142768536	142846565	0.3686	0.5519	-0.1833
ADGB,STXBP5-AS1	147137739	147161306	0.3572	0.268	0.0892
TMEM181	158956658	159056490	0.3372	0.2547	0.0825
TFB1M,NOX3	155636768	155715385	0.3207	0.363	-0.0423
ULBP2,ULBP1	150271944	150283907	0.3198	0.383	-0.0632
PEX3	143772311	143812033	0.3181	0.3833	-0.0652
MAP3K4,AGPAT4	161539520	161550032	0.313	0.0628	0.2502
SNX9,SYNJ2	158367223	158401174	0.297	0.1002	0.1968
MIR4465,NMBR	141006355	142395720	0.2749	0.7964	-0.5215
SFT2D1	166732587	166755480	0.2544	0.0633	0.1911
LRP11	150139112	150184208	0.2524	0.0402	0.2122
TTLL2	167738595	167744473	0.2448	0.0089	0.2359
MYCT1,VIP	153046842	153070786	0.2379	0.0014	0.2365
PPP1R14C,IYD	150572568	150688732	0.2338	0.552	-0.3182
PPIL4,GINM1	149868764	149886258	0.2332	0.1809	0.0523
SLC22A1,SLC22A2	160581374	160636637	0.2198	-0.0023	0.2221
TULP4,TMEM181	158934145	158955158	0.2196	0.1377	0.0819
LOC102723831	151517104	151549416	0.2185	0.0216	0.1969
ACAT2	160183382	160199426	0.2074	0.0106	0.1968
ALDH8A1	135237686	135272087	0.2043	0.0023	0.202
MTHFD1L,LOC102723831	151424379	151516795	0.2029	0.5753	-0.3724
SLC22A1	160543080	160580496	0.1994	0.0026	0.1968
ESR1,SYNE1	152425582	152441587	0.1989	0.0022	0.1967
FUCA2,LOC285740	143834441	143873045	0.1989	-0.0023	0.2012
TMEM242,ZDHHC14	157747707	157801186	0.1984	0.0017	0.1967
ULBP3	150384827	150390213	0.1978	0.0008	0.197
LOC100128176	149275403	149285768	0.1976	0.0009	0.1967
PCMT1,LRP11	150133601	150138734	0.1973	0.0006	0.1967
SHPRH,GRM1	146286620	146347836	0.1953	0.3784	-0.1831
TFB1M	155577374	155636071	0.1942	-0.0026	0.1968
AIG1,ADAT2	143662850	143742264	0.1724	-0.2698	0.4422
SF3B5,STX11	144417941	144469837	0.1696	0.1548	0.0148
PRR18,SFT2D1	166722871	166732338	0.1612	0.158	0.0032
IYD,PLEKHG1	150726899	150918964	0.156	0.552	-0.396
LINC01010,LOC101928304	134826329	134845441	0.156	-0.0406	0.1966
T	166570156	166582979	0.1505	0.1135	0.037
PEX7	137142886	137235988	0.1398	-0.0568	0.1966
TCP1	160199687	160210599	0.1375	0.0104	0.1271
MIR548A1,LOC101928519	18726551	18771945	0.1322	0.1038	0.0284
GPR126	142623952	142767890	0.1189	0.552	-0.4331
ZC3H12D	149767921	149806924	0.1166	0.2281	-0.1115
PLG	161122274	161175730	0.1126	0.004	0.1086
MAS1,IGF2R	160330396	160388772	0.1109	0.0023	0.1086
MYCT1	153018034	153046455	0.1077	-0.1186	0.2263
MPC1,RPS6KA2	166798478	166821813	0.0988	0.0628	0.036
FNDC1	159591403	159693967	0.0976	-0.5344	0.632
LOC153910	142846707	142960001	0.0951	0.5558	-0.4607
HIVEP2	143072350	143265487	0.0909	0.552	-0.4611
STX11	144473172	144513733	0.0864	0.6059	-0.5195
IPCEF1,CNKSR3	154679267	154725382	0.0847	-0.2698	0.3545
RAB32,LOC101928661	146879427	146914246	0.0833	0.5519	-0.4686
UTRN,EPM2A	145175208	145945278	0.08	0.5986	-0.5186
CCDC170,ESR1	151943434	152010561	0.0745	0.5519	-0.4774
AIG1	143380517	143662386	0.072	0.5539	-0.4819
OR12D2,OR11A1	29378439	29378620	0.0704	0.0027	0.0677
MRAP2,CEP162	84816620	84816630	0.067	0.0628	0.0042
WTAP	160147058	160178323	0.0669	0.0628	0.0041
IGF2R,SLC22A1	160528634	160541348	0.0659	0.0628	0.0031
LINC01013	132454127	132491083	0.0604	-0.1408	0.2012
SASH1	148663071	148874177	0.0564	0.5782	-0.5218
UST	149067372	149399100	0.0446	0.5645	-0.5199
ADAT2	143743617	143771144	0.0371	0.5507	-0.5136
GRM1,RAB32	146759992	146863522	0.0344	0.5536	-0.5192
ESR1	152010807	152425185	0.0337	0.552	-0.5183
PLAGL1	144260703	144384404	0.0327	0.5519	-0.5192
ADGB	146920271	147136528	0.031	0.5538	-0.5228
UTRN	144611924	145175023	0.0301	0.5519	-0.5218
GRM1	146348747	146759661	0.0301	0.5538	-0.5237
SAMD5,SASH1	147892247	148661889	0.0296	0.552	-0.5224
C6orf118,PDE10A	165724152	165739330	0.0286	0.0017	0.0269
TAB2	149538248	149733664	0.0282	0.5519	-0.5237
EPM2A	145945442	146055568	0.0266	0.552	-0.5254
LOC729658	163602773	163612783	0.0196	0.0007	0.0189
TTLL2,TCP10	167761543	167763664	0.0182	0.0025	0.0157
PACRG-AS1	163731037	163746335	0.0178	0.0301	-0.0123
RAET1L	150340526	150347617	0.0176	0.0145	0.0031
RSPH3	159397855	159422197	0.0146	0.0052	0.0094
RPS6KA2,RPS6KA2-AS1	167276822	167308627	0.0136	0.003	0.0106
LOC102723883,LOC101928280	68848649	68848649	0.0131	0.0041	0.009
FBXO30	146125535	146126580	0.0123	0.009	0.0033
ME1,PRSS35	84156904	84158736	0.0118	0.0048	0.007
LOC102723831,AKAP12	151550702	151559852	0.011	0.0035	0.0075
C6orf211	151774339	151792026	0.011	0.0021	0.0089
RAET1E-AS1	150186524	150240083	0.0106	0.0046	0.006
LINC01277,AIG1	143359846	143379481	0.0105	0.0014	0.0091
PKIB	122842333	122842439	0.0092	0.0017	0.0075
HDGFL1,NRSN1	23867227	24042393	0.0088	0.0037	0.0051
LOC100289495	166756130	166765805	0.0076	0.0025	0.0051
FBXO5	153290809	153305563	0.0075	0.0014	0.0061
RAET1G,ULBP2	150245907	150262097	0.0074	0.0014	0.006
TAAR1	132965208	132968095	0.0073	0.0014	0.0059
ZBTB2,RMND1	151713902	151724756	0.0073	0.0014	0.0059
MED23	131895144	131950233	0.0072	0.0016	0.0056
CLDN20	155585154	155597644	0.0069	0.0013	0.0056
GTF2H5	158589608	158620608	0.0067	0.0033	0.0034
DKFZp451B082	163758941	163769011	0.0067	-0.0008	0.0075
BCLAF1	136577200	136609564	0.0065	-0.0022	0.0087
GMDS	1737852	1738222	0.0063	0.0033	0.003
SNHG5,HTR1E	86685341	87236398	0.0061	0.0008	0.0053
PEX7,SLC35D3	137236179	137242096	0.0061	0.0014	0.0047
ACOT13	24677968	24679178	0.0057	0.0026	0.0031
LOC100507406	138050926	138061071	0.0055	0.0019	0.0036
RAET1E	150209717	150212003	0.0054	0.001	0.0044
FLJ46906	139011836	139019029	0.0052	0.001	0.0042
PACRG-AS1,DKFZp451B082	163746575	163758350	0.0052	0.0015	0.0037
EYS	65036207	66043219	0.0051	0.0007	0.0044
RAET1K,RAET1L	150327994	150340075	0.0051	0.002	0.0031
BCKDHB	80895635	81006968	0.0049	0.0016	0.0033
HLA-A,HCG9	29936065	29936408	0.0046	0.0022	0.0024
LOC102724201,TBX18	85422442	85430017	0.0046	0.0016	0.003
LATS1,NUP43	150041404	150043021	0.0045	0.0016	0.0029
GSTA3,GSTA4	52782096	52783041	0.0043	-0.0016	0.0059
VNN3	133043016	133056638	0.0043	0.0008	0.0035
LOC100289495,MPC1	166766142	166777115	0.0043	0.0008	0.0035
NONE,HACE1	104794722	105107744	0.0042	0.0008	0.0034
MAP3K5,PEX7	137114758	137141890	0.0042	0.0013	0.0029
GOPC,LOC101927919	117940061	117941035	0.0041	0.0008	0.0033
WTAP,LOC100129518	160178665	160180003	0.0041	0.0008	0.0033
TFAP2B,PKHD1	51272494	51275121	0.0041	0.0007	0.0034
KATNBL1P6	147122877	147124497	0.004	-0.0016	0.0056
TAAR9	132859437	132860742	0.0039	0.0007	0.0032
MTCH1	36936483	36946458	0.0039	0.0008	0.0031
HMGA1P7	134434329	134439764	0.0039	0.0011	0.0028
TPBG,UBE3D	83195087	83195206	0.0038	0.0007	0.0031
SF3B5	144415154	144417730	0.0038	0.0007	0.0031
LOC101929122	159585941	159590086	0.0038	0.0008	0.003
CAHM	163833269	163834157	0.0038	0.0007	0.0031
CTGF	132268964	132273264	0.0037	0.0007	0.003
TAAR3,TAAR2	132931457	132937091	0.0037	0.0007	0.003
TCF21	134210598	134217540	0.0037	0.0007	0.003
LOC101928461	136950396	136969018	0.0037	0.0007	0.003
RPS18P9	149914345	149915398	0.0037	0.0007	0.003
RAET1G	150238160	150245203	0.0037	0.0007	0.003
RAET1K	150318281	150327202	0.0037	0.0007	0.003
AKAP12,ZBTB2	151681431	151683721	0.0037	0.0007	0.003
VIP	153071646	153080640	0.0037	0.0007	0.003
DYNLT1	159057746	159066787	0.0037	0.0007	0.003
ME1	84102004	84102550	0.0036	0.0007	0.0029
PDSS2	107620876	107620876	0.0036	0.0007	0.0029
ARG1	131893463	131900390	0.0036	0.0007	0.0029
ARG1,MED23	131895920	131904719	0.0036	0.0007	0.0029
TAAR6	132890748	132893004	0.0036	0.0007	0.0029
TAAR5	132908879	132911719	0.0036	0.0007	0.0029
MAP7,MAP3K5	136873702	136877044	0.0036	0.0007	0.0029
PBOV1	138537432	138539556	0.0036	0.0007	0.0029
CITED2	139692511	139696429	0.0036	0.0007	0.0029
LOC645434	139789339	139796329	0.0036	0.0007	0.0029
MIR4465	141004533	141005338	0.0036	0.0007	0.0029
NUP43	150045436	150067989	0.0036	0.0008	0.0028
TAGAP	159454897	159466214	0.0036	0.0007	0.0029
LOC729603	160514246	160517094	0.0036	0.0008	0.0028
LINC00473,LINC00602	166401103	166401512	0.0036	0.0008	0.0028
MPC1	166777599	166795768	0.0036	0.0007	0.0029
VNN2,SLC18B1	133085941	133088814	0.0035	0.0007	0.0028
MRPL18	160211554	160219973	0.0035	0.0007	0.0028
NT5DC1	116565504	116566438	0.0035	0.0006	0.0029
DYNLT1,SYTL3	159067429	159069940	0.0034	0.0007	0.0027
OR2B6,ZNF165	27969004	27970391	0.0034	0.0006	0.0028
RUNX2	45459922	45459922	0.0034	0.0006	0.0028
MIR2113,POU3F2	98980113	99064295	0.0034	0.0006	0.0028
RPS12,SNORA33	133139026	133139334	0.0034	0.0006	0.0028
MTFR2,BCLAF1	136572881	136576589	0.0034	0.0006	0.0028
HYMAI	144324316	144329814	0.0034	0.0006	0.0028
SYNE1-AS1	152701996	152702821	0.0034	0.0006	0.0028
MIR3918;EZR,SYTL3	159185959	159186692	0.0034	0.0006	0.0028
AGPAT4-IT1	161582291	161582693	0.0034	0.0006	0.0028
LINC00602	166402014	166403991	0.0034	0.0006	0.0028
RNGTT,PNRC1	89679114	89705618	0.0032	0.0006	0.0026
SLC35A1	88193552	88193852	0.0031	0.0007	0.0024
LACE1	108699897	108699897	0.003	0.0011	0.0019
HEBP2,NHSL1	138737676	138742172	0.003	0.0007	0.0023
ZBED9,LOC401242	28557129	28744045	0.0029	0.0007	0.0022
GFOD1,SIRT5	13521802	13560418	0.0028	0	0.0028
MTRF1L,RGS17	153324991	153330468	0.0028	0	0.0028
TREM1,NCR2	41276004	41276004	0.0027	0	0.0027
NOTCH4,C6orf10	32223632	32223785	0.0025	0.0008	0.0017
BEND6	56840346	56840553	0.0022	0	0.0022
LINC01312	134142442	134174768	0.0018	0	0.0018
PRR18	166718235	166722714	0.0015	0	0.0015
IL22RA2,IFNGR1	137496672	137517491	0.0014	-0.0022	0.0036
TAAR3	132928683	132931433	0.0009	-0.0022	0.0031
LOC101929239	163464719	163474312	0.0008	-0.0023	0.0031
NHEG1	137302669	137313467	0.0007	-0.0022	0.0029
ALDH8A1,HBS1L	135272356	135280438	0.0005	-0.0023	0.0028
NMBR	142395799	142410797	-0.0034	0.0563	-0.0597
STXBP5-AS1	147161829	147524615	-0.0055	0.5541	-0.5596
PDE7B,MTFR2	136520019	136551127	-0.013	0.0013	-0.0143
IFNGR1	137517772	137541521	-0.0154	-0.0023	-0.0131
GRIK2	101961643	101961806	-0.0204	0.0008	-0.0212
PCMT1	150070095	150133188	-0.0266	0.002	-0.0286
RSPH3,TAGAP	159422463	159454387	-0.036	0.0075	-0.0435
GINM1	149886781	149911554	-0.0361	0.0074	-0.0435
ZBTB2	151684322	151713648	-0.0378	0.0071	-0.0449
PLEKHG1,MTHFD1L	151165830	151185555	-0.0379	-0.0409	0.003
HIVEP2,LINC01277	143270007	143285637	-0.0398	0.0016	-0.0414
TAB2,ZC3H12D	149733871	149767105	-0.0413	0.0023	-0.0436
MEI4,IRAK1BP1	78898738	79567719	-0.0414	0.0007	-0.0421
KATNA1	149916013	149969663	-0.0415	0.002	-0.0435
CLDN20,TFB1M	155585868	155596700	-0.0421	0.0014	-0.0435
PLAGL1,SF3B5	144387094	144414868	-0.0458	-0.0023	-0.0435
RIMS1	72854149	72854283	-0.052	0.0006	-0.0526
LPAL2,LPA	160934608	160949428	-0.053	0.0006	-0.0536
LINC00326,EYA4	133428933	133561012	-0.0563	-0.273	0.2167
ULBP1,RAET1K	150296333	150318085	-0.0577	0.0625	-0.1202
OSTCP1,C6orf99	159279904	159308521	-0.0618	0.059	-0.1208
TXLNB	139560803	139614025	-0.0634	0.0019	-0.0653
LOC100507557	146057217	146207657	-0.0635	0.4609	-0.5244
TNFAIP3	138189515	138203742	-0.0636	0.0016	-0.0652
ENPP1,CTGF	132217556	132267818	-0.073	-0.2698	0.1968
C6orf99,RSPH3	159332825	159396919	-0.0779	-0.0406	-0.0373
LOC101928231	134749220	134799829	-0.0825	0.0136	-0.0961
SLC2A12	134308725	134374673	-0.0871	-0.0218	-0.0653
SYNE1,MYCT1	152959648	153017986	-0.0917	-0.3135	0.2218
ZC3H12D,PPIL4	149807523	149823899	-0.1179	0.0022	-0.1201
FLJ46906,LOC100507462	139019628	139044135	-0.1236	-0.2779	0.1543
LOC285740,PHACTR2	143891950	143928313	-0.1291	0.3623	-0.4914
NMBR,VTA1	142411084	142466756	-0.1326	-0.2698	0.1372
GUSBP4,NONE	58294828	58779473	-0.1407	-0.1456	0.0049
SASH1,UST	148874209	149066706	-0.1477	0.377	-0.5247
RMND1	151725206	151773206	-0.1481	0.3674	-0.5155
PDE10A	165740447	166073277	-0.1532	-0.6122	0.459
VNN1,VNN3	133036214	133042840	-0.1729	-0.2687	0.0958
CEP85L	118817068	118907285	-0.1771	0.0014	-0.1785
PERP,KIAA1244	138430056	138482043	-0.1798	0.0027	-0.1825
SLC35D3	137242532	137247466	-0.1814	0.0015	-0.1829
TAAR8,TAAR6	132876414	132890341	-0.1816	0.0014	-0.183
TAAR9,TAAR8	132861957	132872759	-0.1817	0.0014	-0.1831
SLC35D3,NHEG1	137248032	137302244	-0.1823	-0.2536	0.0713
LINC00326	133409004	133428350	-0.199	-0.016	-0.183
MED23,ENPP3	131950401	131956670	-0.1994	-0.2024	0.003
KATNA1,LATS1	149972087	149977802	-0.2037	0.0015	-0.2052
RAET1L,ULBP3	150347787	150384648	-0.2071	-0.2698	0.0627
LATS1	149978321	150039720	-0.2079	-0.0023	-0.2056
VTA1	142467387	142542136	-0.2471	-0.0639	-0.1832
LINC01277	143286922	143359128	-0.2559	0.2224	-0.4783
MRPL18,TCP1	160210871	160211485	-0.2589	-0.4757	0.2168
VNN3,VNN2	133057017	133063684	-0.2641	-0.2698	0.0057
LTV1	144165285	144184227	-0.2642	-0.2698	0.0056
MTRF1L	153307949	153324546	-0.2669	-0.2698	0.0029
LOC285740	143874639	143891420	-0.2846	-0.3291	0.0445
PACRG	163148166	163735945	-0.2911	-0.602	0.3109
RAB32	146863903	146876819	-0.2942	-0.2698	-0.0244
SMLR1	131147611	131158670	-0.3003	-0.269	-0.0313
PDE10A,LINC00473	166077817	166335959	-0.3004	-0.5987	0.2983
PPIL4	149825264	149866780	-0.3132	-0.2698	-0.0434
VNN1	133001279	133036058	-0.3133	-0.2698	-0.0435
LOC102724053,SOD2	159818688	160099143	-0.3174	-0.6573	0.3399
STX7,TAAR9	132835568	132858174	-0.3196	-0.2694	-0.0502
EZR-AS1,OSTCP1	159244973	159261067	-0.3275	-0.5241	0.1966
RPS6KA2-IT1	166874223	166878799	-0.335	-0.3847	0.0497
TULP4	158732819	158933084	-0.3414	-0.8262	0.4848
RPS12,LINC00326	133139720	133408132	-0.3424	-0.8243	0.4819
LPAL2	160887192	160932114	-0.4065	-0.6032	0.1967
TAAR5,TAAR3	132911899	132928031	-0.4152	-0.2362	-0.179
OSTCP1	159261360	159279553	-0.4157	-0.6124	0.1967
PLG,MAP3K4	161176256	161411449	-0.4238	-0.7633	0.3395
C6orf118	165692224	165724052	-0.4511	-0.5889	0.1378
PARK2	161768004	163147788	-0.4521	-0.8816	0.4295
ULBP3,PPP1R14C	150391236	150462959	-0.4524	-0.2698	-0.1826
STX7	132778215	132835314	-0.4527	-0.2698	-0.1829
KIAA1244	138483517	138665889	-0.4552	-0.8835	0.4283
STXBP5	147525846	147712079	-0.4727	-0.2698	-0.2029
QKI,C6orf118	164000948	165691761	-0.4744	-0.9068	0.4324
REPS1,ABRACL	139311050	139348484	-0.4746	-0.2698	-0.2048
QKI	163837341	164000396	-0.4772	-0.8265	0.3493
TBPL1	134272398	134308187	-0.4834	0.0018	-0.4852
CCDC28A	139094937	139115303	-0.4864	-0.4354	-0.051
EZR	159186958	159239004	-0.4945	-0.4334	-0.0611
GMDS-AS1	2376528	2376667	-0.4976	0.001	-0.4986
LOC102723649,LOC100507406	137996779	138049711	-0.4977	0.0264	-0.5241
NHSL1	138742249	138894561	-0.5022	-0.2698	-0.2324
TAAR1,VNN1	132968257	133000800	-0.5078	-0.2857	-0.2221
LOC101928304	134846112	134862110	-0.5163	0.001	-0.5173
OLIG3	137812582	137816345	-0.522	0.0008	-0.5228
SYTL3	159070442	159185563	-0.5331	-0.4896	-0.0435
T,LOC101929297	166583207	166649210	-0.5358	-0.5878	0.052
MAP3K4	161411973	161539375	-0.5384	-0.7899	0.2515
FNDC1,LOC102724053	159694344	159803460	-0.5419	-0.8252	0.2833
AKAP12	151560193	151680678	-0.5492	-0.7567	0.2075
PNLDC1	160220575	160242684	-0.556	-0.6127	0.0567
IL20RA	137320304	137367161	-0.5604	-0.757	0.1966
LOC102724053	159803605	159817950	-0.5649	-0.54	-0.0249
RPS6KA2	166822018	167276041	-0.5968	-0.8275	0.2307
SLC22A3,LPAL2	160875494	160886475	-0.597	-0.6032	0.0062
PNLDC1,MAS1	160242841	160326840	-0.6041	-0.8244	0.2203
MYB,AHI1	135541395	135604070	-0.6043	-0.8011	0.1968
AGPAT4	161550148	161695750	-0.605	-0.8252	0.2202
SOD2	160099260	160115127	-0.6056	-0.6126	0.007
IGF2R	160389548	160528237	-0.6084	-0.826	0.2176
AIRN	160424760	160428561	-0.6091	-0.6122	0.0031
SOD2,WTAP	160115421	160146670	-0.6097	-0.8247	0.215
LOC101929297,PRR18	166671718	166718042	-0.614	-0.8262	0.2122
SLC18B1,RPS12	133120782	133134472	-0.6276	-0.8243	0.1967
AKAP7	131456023	131605434	-0.6286	-0.8254	0.1968
LINC00602,T	166404335	166570112	-0.6317	-0.8239	0.1922
TAGAP,LOC101929122	159467351	159585252	-0.632	-0.8559	0.2239
SGK1	134490957	134639713	-0.6422	-0.2698	-0.3724
CTGF,LINC01013	132273991	132453620	-0.6448	-0.8817	0.2369
EPB41L2,AKAP7	131385986	131455518	-0.6669	-0.8793	0.2124
LOC100132735,LOC100507477	140182769	140296384	-0.6669	-0.8796	0.2127
DKFZp451B082,CAHM	163769090	163832755	-0.6704	-0.8254	0.155
LPA	160952816	161088399	-0.677	-0.8796	0.2026
SLC22A2,SLC22A3	160681063	160768212	-0.6788	-0.8756	0.1968
MOXD1	132616654	132722837	-0.6801	-0.8814	0.2013
REPS1	139225791	139309903	-0.683	-0.882	0.199
LINC00271	135819737	136012781	-0.6847	-0.8814	0.1967
IL22RA2	137464218	137495707	-0.6851	-0.8817	0.1966
MYB	135502040	135541194	-0.6853	-0.882	0.1967
AHI1	135604158	135818135	-0.6856	-0.8823	0.1967
LINC01312,TARID	134143009	134172296	-0.7253	-0.273	-0.4523
LOC100507462	139045368	139094638	-0.741	-0.273	-0.468
ABRACL	139349151	139365330	-0.7488	-0.2698	-0.479
LOC100507477,LOC103352541	140299690	140311604	-0.7557	-0.7618	0.0061
LOC100132735	140092048	140182546	-0.7574	-0.8248	0.0674
MIR3668	140525948	140527294	-0.7575	-0.7635	0.006
STXBP5,SAMD5	147713151	147828738	-0.771	-0.2698	-0.5012
TXLNB,CITED2	139614425	139692331	-0.779	-0.8249	0.0459
SAMD5	147830073	147892127	-0.7865	-0.2698	-0.5167
ENPP3	131957905	132069529	-0.7875	-0.2698	-0.5177
FUCA2	143815127	143833897	-0.7878	-0.2698	-0.518
STX11,UTRN	144514425	144611581	-0.7917	-0.2697	-0.522
HECA,TXLNB	139503128	139559885	-0.7926	-0.2698	-0.5228
MTFR2	136551487	136572311	-0.7935	-0.2698	-0.5237
HECA	139457971	139502639	-0.7939	-0.2698	-0.5241
LINC01013,MOXD1	132491930	132615068	-0.8103	-0.2698	-0.5405
VNN2	133064474	133085461	-0.8194	-0.8251	0.0057
TAAR6,TAAR5	132893712	132908654	-0.8211	-0.8243	0.0032
RPS12	133135413	133139610	-0.8212	-0.8241	0.0029
LINC01010	134758900	134825313	-0.8468	-0.8886	0.0418
TAAR2	132937346	132946302	-0.8648	-0.8399	-0.0249
LOC102723649	137985859	137996660	-0.8661	-0.8225	-0.0436
MAS1	160327134	160329616	-0.8672	-0.8249	-0.0423
LINC01010,LOC101928231	134759242	134798147	-0.869	-0.6503	-0.2187
HBS1L,MYB	135377091	135500773	-0.8721	-0.3506	-0.5215
PERP	138408768	138429651	-0.8806	-0.8838	0.0032
SLC22A3	160770220	160874098	-0.9527	-0.8895	-0.0632
LINC00473	166336597	166400854	-0.9628	-0.8262	-0.1366
L3MBTL3	130400092	130463194	-1.0054	-0.8225	-0.1829
SLC18B1	133089557	133120725	-1.0076	-0.8246	-0.183
MOXD1,STX7	132724116	132777463	-1.0088	-0.8256	-0.1832
ECT2L	139116706	139224903	-1.0567	-0.7551	-0.3016
SLC2A12,HMGA1P7	134375588	134434008	-1.0627	-0.8799	-0.1828
HEBP2	138724658	138735517	-1.0637	-0.8808	-0.1829
ENPP1	132128401	132216287	-1.0647	-0.8817	-0.183
PLEKHG1	150920008	151165708	-1.194	-0.7115	-0.4825
BCLAF1,MAP7	136612727	136660065	-1.1972	-0.8805	-0.3167
IL20RA,IL22RA2	137367368	137463567	-1.2702	-0.8796	-0.3906
LOC100507477,MIR3668	140415973	140524081	-1.2844	-0.7652	-0.5192
MIR3668,MIR4465	140527653	141001882	-1.2859	-0.7641	-0.5218
ABRACL,HECA	139366340	139455233	-1.3034	-0.7901	-0.5133
EPB41L2	131159590	131385227	-1.3155	-0.7937	-0.5218
LOC101928304,ALDH8A1	134862537	135237359	-1.3199	-0.8832	-0.4367
SGK1,LOC101928231	134640332	134749096	-1.3351	-0.8241	-0.511
LOC100507477	140296625	140415139	-1.3399	-0.8256	-0.5143
HMGA1P7,SGK1	134440071	134489307	-1.3415	-0.8251	-0.5164
LOC645434,LOC100132735	139797319	140090782	-1.3461	-0.8243	-0.5218
LOC100130476	138144078	138188713	-1.3464	-0.8262	-0.5202
HBS1L	135280519	135376861	-1.3487	-0.8256	-0.5231
CITED2,LOC645434	139697704	139789100	-1.3501	-0.8241	-0.526
IFNGR1,OLIG3	137542091	137812323	-1.3564	-0.8826	-0.4738
KIAA1244,HEBP2	138666838	138724013	-1.359	-0.8841	-0.4749
LOC100507406,LOC100130476	138063120	138143632	-1.3629	-0.8817	-0.4812
TCF21,TBPL1	134217699	134272072	-1.3648	-0.8829	-0.4819
NHSL1,FLJ46906	138894852	139011415	-1.3657	-0.841	-0.5247
MAP3K5	136878046	137112633	-1.3682	-0.8148	-0.5534
EYA4	133561646	133849868	-1.396	-0.882	-0.514
ENPP3,ENPP1	132069917	132127669	-1.3999	-0.882	-0.5179
TARID	133824071	134210037	-1.4019	-0.8811	-0.5208
AKAP7,ARG1	131609065	131893281	-1.4043	-0.8825	-0.5218
TNFAIP3,PERP	138209785	138408573	-1.4043	-0.8832	-0.5211
MAP7	136662686	136872558	-1.4051	-0.8817	-0.5234
TMEM200A	130687773	130765164	-1.4052	-0.8811	-0.5241
PDE7B	136172958	136517545	-1.4066	-0.8848	-0.5218
SAMD3	130464449	130686525	-1.4071	-0.8817	-0.5254
LINC00271,PDE7B	136013534	136171566	-1.4073	-0.8842	-0.5231
OLIG3,LOC102723649	137816766	137985652	-1.4073	-0.8832	-0.5241
TMEM200A,SMLR1	130765415	131147496	-1.4409	-0.8823	-0.5586
